# Supplementary material for: Development of a fluorous trapping reagent for rapid detection of electrophilic reactive metabolites
Source: Royal Society of Chemistry journal article supplement (doi:10.1039/d4ay00577e), 2024-01-01
Supplement: d4ay00577e1.pdf [file d4ay00577e1.pdf]

Supplementary Information

Development of a fluorous trapping reagent for rapid detection of electrophilic reactive metabolites

Yusuke Akagi<sup>ab</sup>, Hiroyuki Yamakoshi<sup>a</sup> and Yoshiharu Iwabuchi<sup>\*a</sup>

<sup>a</sup>*Graduate School of Pharmaceutical Sciences Tohoku University 6-3, Aoba, Aramaki, Aoba-ku, Sendai, Japan.*

<sup>b</sup>*Toxicology Research Laboratories, Central Pharmaceutical Research Institute, Japan Tobacco Inc. 1-13-2 Fukuura, Kanazawa-ku, Yokohama, Kanagawa Japan.*

*\* Corresponding author: E-mail: y-iwabuchi@tohoku.ac.jp*

**Table of Contents**

1. Supplementary figures
2. Experimental procedures
3. Copies of <sup>1</sup>H, <sup>13</sup>C and <sup>19</sup>F NMR spectra
4. Additional references

## 1. Supplementary figures

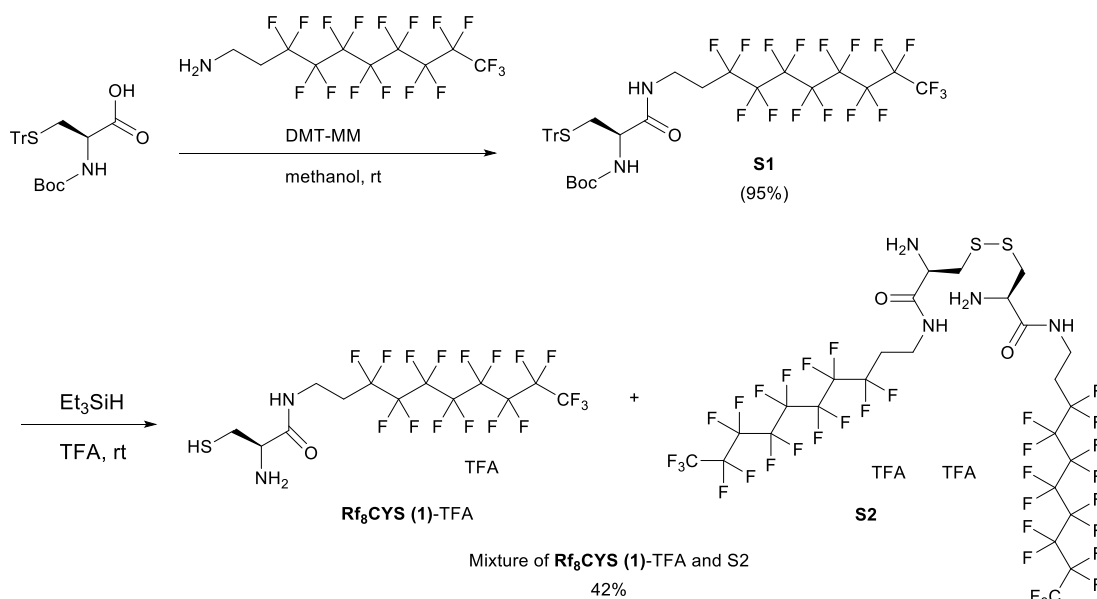

**Scheme S1** Synthesis route of **Rf<sub>8</sub>CYS (1)-trifluoroacetic acid (TFA)**.

**Rf<sub>8</sub>CYS-TFA** was synthesized from *N*-(*tert*-butoxycarbonyl)-*S*-trityl-L-cysteine and was obtained as a mixture with the dimer structure **S2**. **Rf<sub>8</sub>CYS** was converted to **S2** during storage in a refrigerator. Reduction of **S2** with tris(2-carboxyethyl)phosphine hydrochloride (TCEP-HCl) was performed before the use of **Rf<sub>8</sub>CYS-TFA**.

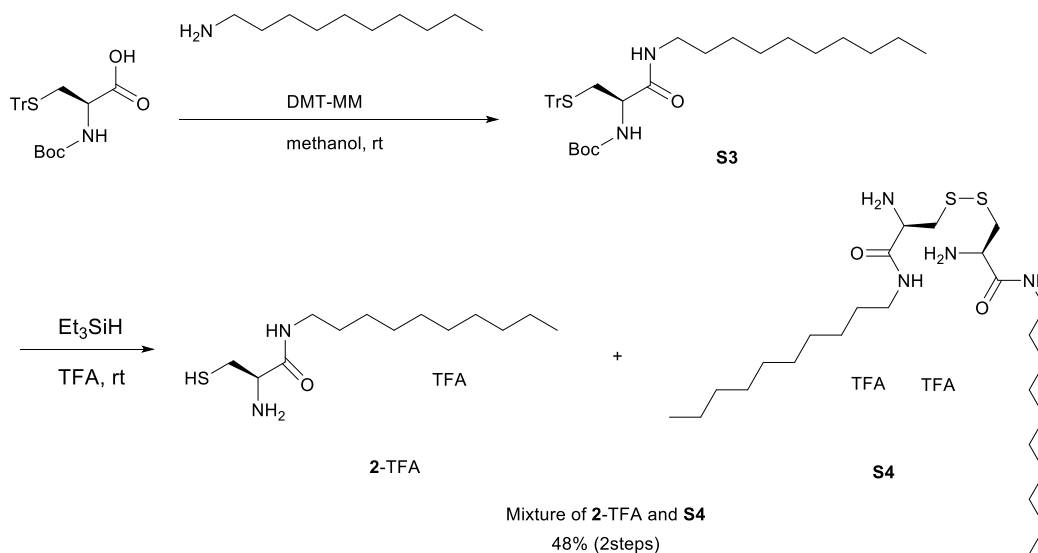

**Scheme S2** Synthesis route of **2-TFA**.

**2-TFA** was synthesized from *N*-(*tert*-butoxycarbonyl)-*S*-trityl-L-cysteine and was obtained as a mixture with the dimer structure **S4**. **2** was converted to **S4** during storage in a refrigerator. Reduction of **S4** with TCEP-HCl is performed before the use of **2-TFA**.

(A) MS chromatogram of Rf<sub>8</sub>CYS

1.5 mmol/L

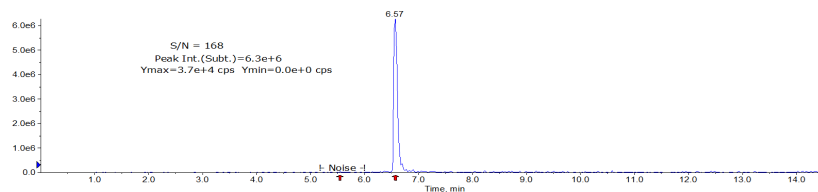

0.15 mmol/L

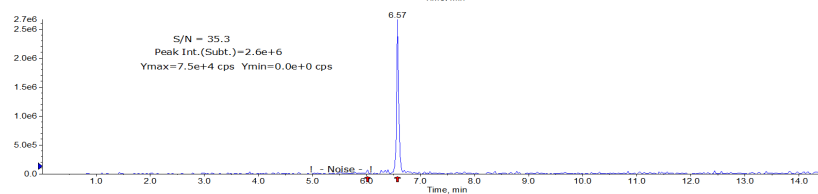

0.015 mmol/L

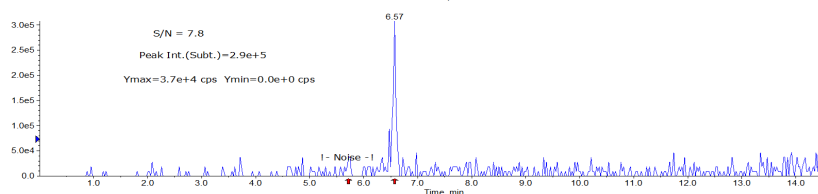

(B) MS chromatogram of **2**

1.5 mmol/L

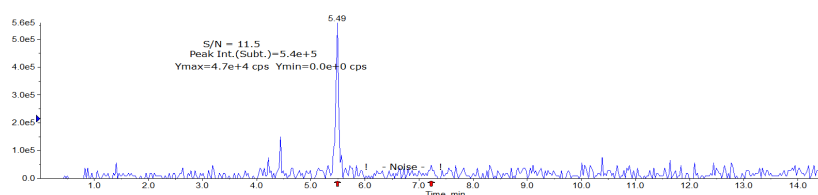

0.15 mmol/L

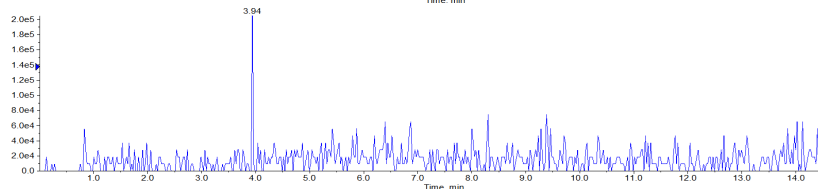

(C)

| Concentration (mmol/L) | Rf <sub>8</sub> CYS (MS chromatogram MS 567) |                   | <b>2</b> (MS chromatogram MS 261) |                   |
|------------------------|----------------------------------------------|-------------------|-----------------------------------|-------------------|
|                        | S/N ratio                                    | Peak int., cps    | S/N ratio                         | Peak int., cps    |
| 1.5                    | 168                                          | 6.3e <sup>6</sup> | 11.5                              | 5.4e <sup>5</sup> |
| 0.15                   | 35.3                                         | 2.6e <sup>6</sup> | -                                 | ND                |
| 0.015                  | 7.8                                          | 2.9e <sup>5</sup> | -                                 | -                 |

**Figure S1** Comparison of sensitivity in LC/MS between Rf<sub>8</sub>CYS and **2**.

MS chromatogram of (A) Rf<sub>8</sub>CYS (*m/z* 567) at concentration of 1.5, 0.15 and 0.015 mmol/L, (B) **2** (*m/z* 261) at the concentrations of 1.5 and 0.15 mmol/L. (C) Signal-to-noise (S/N) ratio and peak intensity at each concentration were compared between Rf<sub>8</sub>CYS and **2**.

The S/N ratio and peak intensity of Rf<sub>8</sub>CYS were more than 10-fold higher than those of **2** at 1.5 mmol/L. Rf<sub>8</sub>CYS was detectable at an S/N ratio of 7.8 even at a concentration of 0.015 mmol/L, whereas **2** was not detectable at a concentration of 0.15 mmol/L.

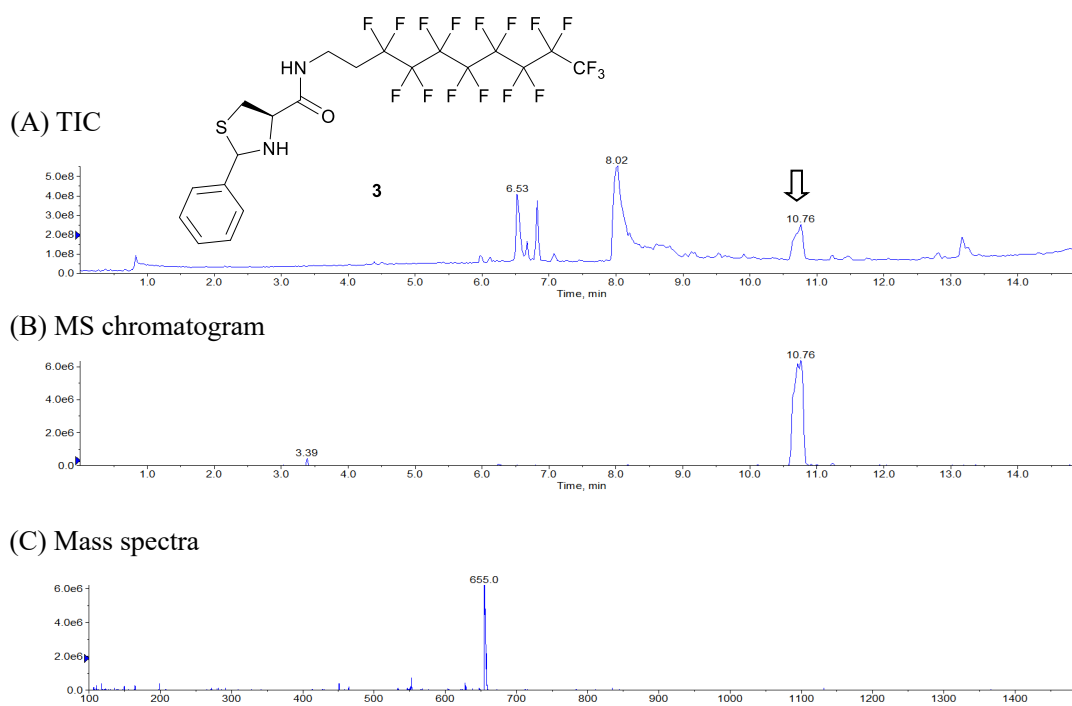

**Figure S2.** Chromatogram, proposed adduct structure and mass spectra of the reaction with Rf<sub>8</sub>CYS and benzaldehyde in phosphate-buffered saline (PBS)/methanol=100/1 (v/v). (A) Total ion chromatogram ( $m/z$  100 to 1500), (B) MS chromatogram ( $m/z$  655), (C) mass spectra of the adduct **3** (retention time 10.76 min).

The structure of **3** was determined by comparing the retention time with that of the product synthesized by another method.

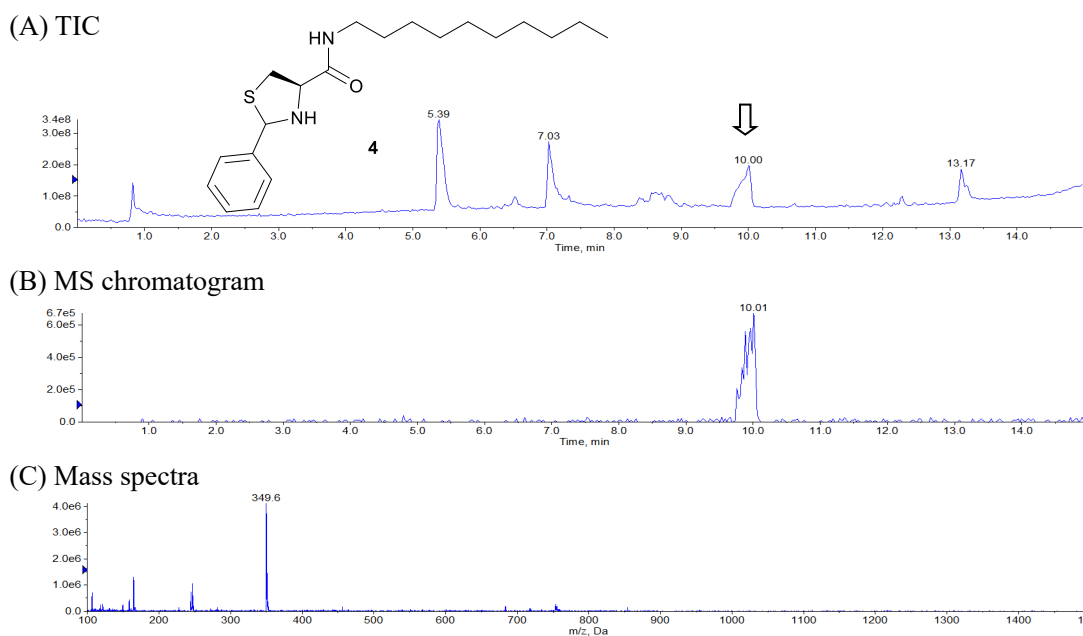

**Figure S3.** Chromatogram, proposed adduct structure and mass spectra of the reaction with **2** and benzaldehyde in PBS/methanol=100/1 (v/v). (A) Total ion chromatogram ( $m/z$  100 to 1500), (B) MS chromatogram ( $m/z$  349), (C) mass spectra of the adduct **4** (retention time 10.00 min).

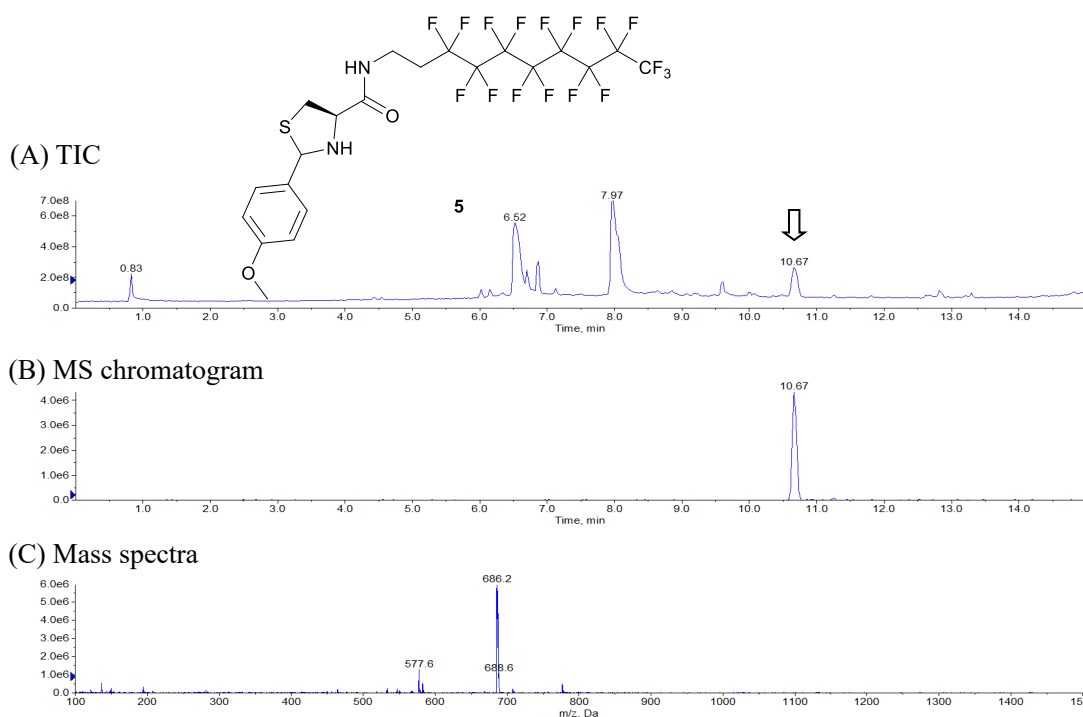

**Figure S4.** Chromatogram, proposed adduct structure and mass spectra of the reaction with  $Rf_3CYS$  and *p*-methoxybenzaldehyde in PBS/methanol=100/1. (A) Total ion chromatogram ( $m/z$  100 to 1500), (B) MS chromatogram ( $m/z$  685), (C) mass spectra of the adduct **5** (retention time 10.67 min).

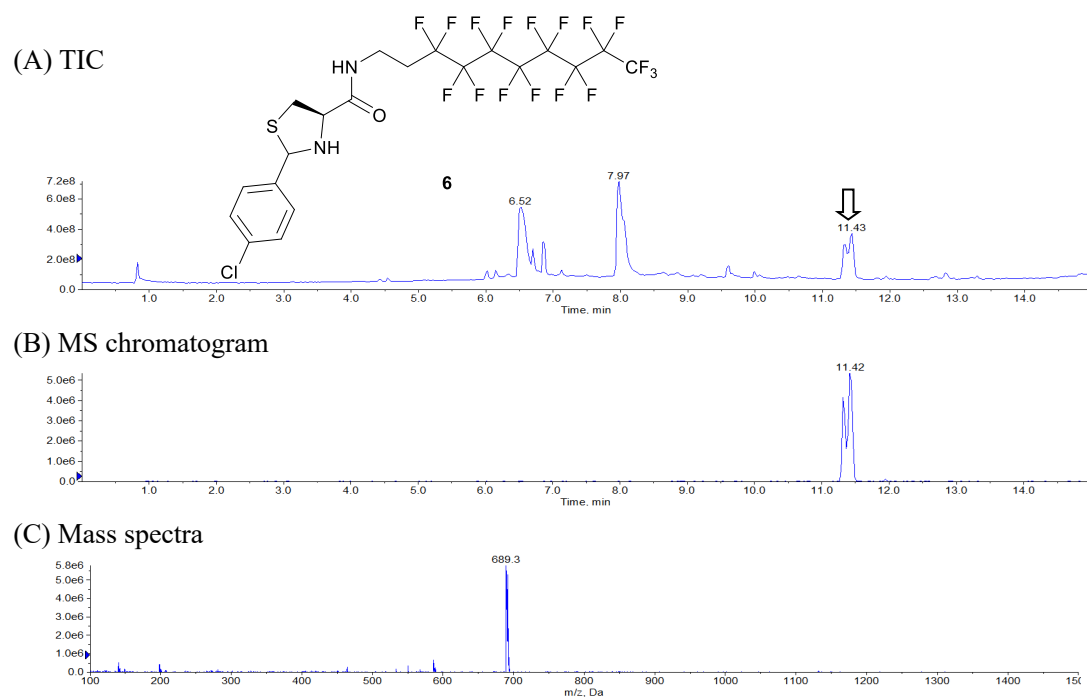

**Figure S5.** Chromatogram, proposed adduct structure and mass spectra of the reaction with  $Rf_3CYS$  and *p*-chlorobenzaldehyde in PBS/methanol=100/1. (A) Total ion chromatogram ( $m/z$  100 to 1500), (B) MS chromatogram ( $m/z$  689), (C) mass spectra of the adduct **6** (retention time 11.42 min).

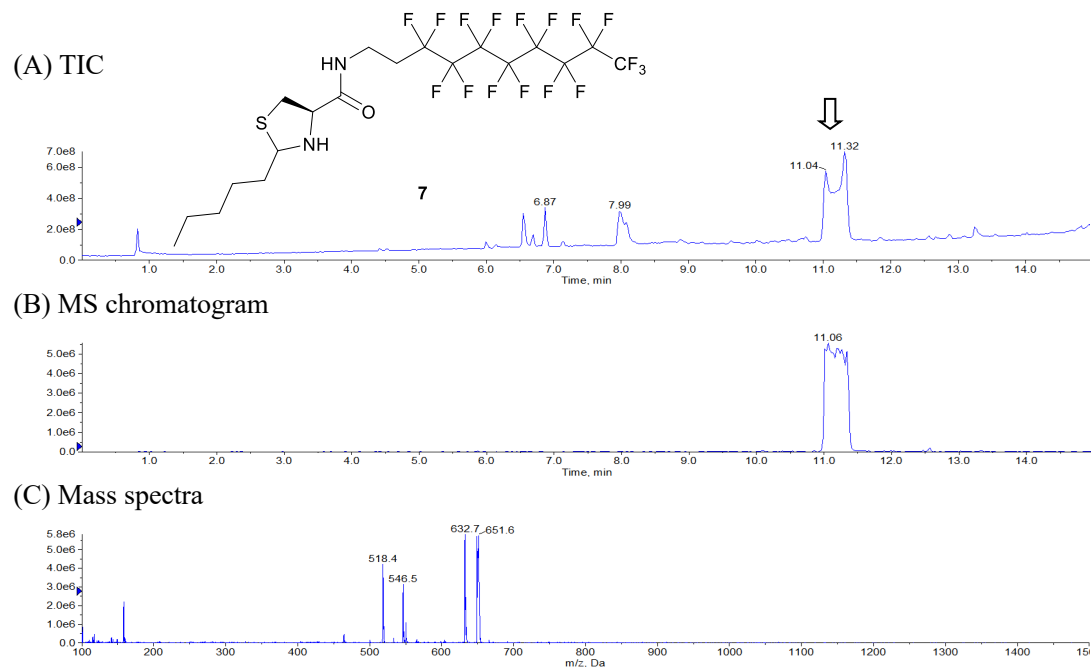

**Figure S6.** Chromatogram, proposed adduct structure and mass spectra of the reaction with  $Rf_3CYS$  and hexanal in PBS/methanol=100/1. (A) Total ion chromatogram ( $m/z$  100 to 1500), (B) MS chromatogram ( $m/z$  649), (C) mass spectra of the adduct **7** (retention time 11.06 min).

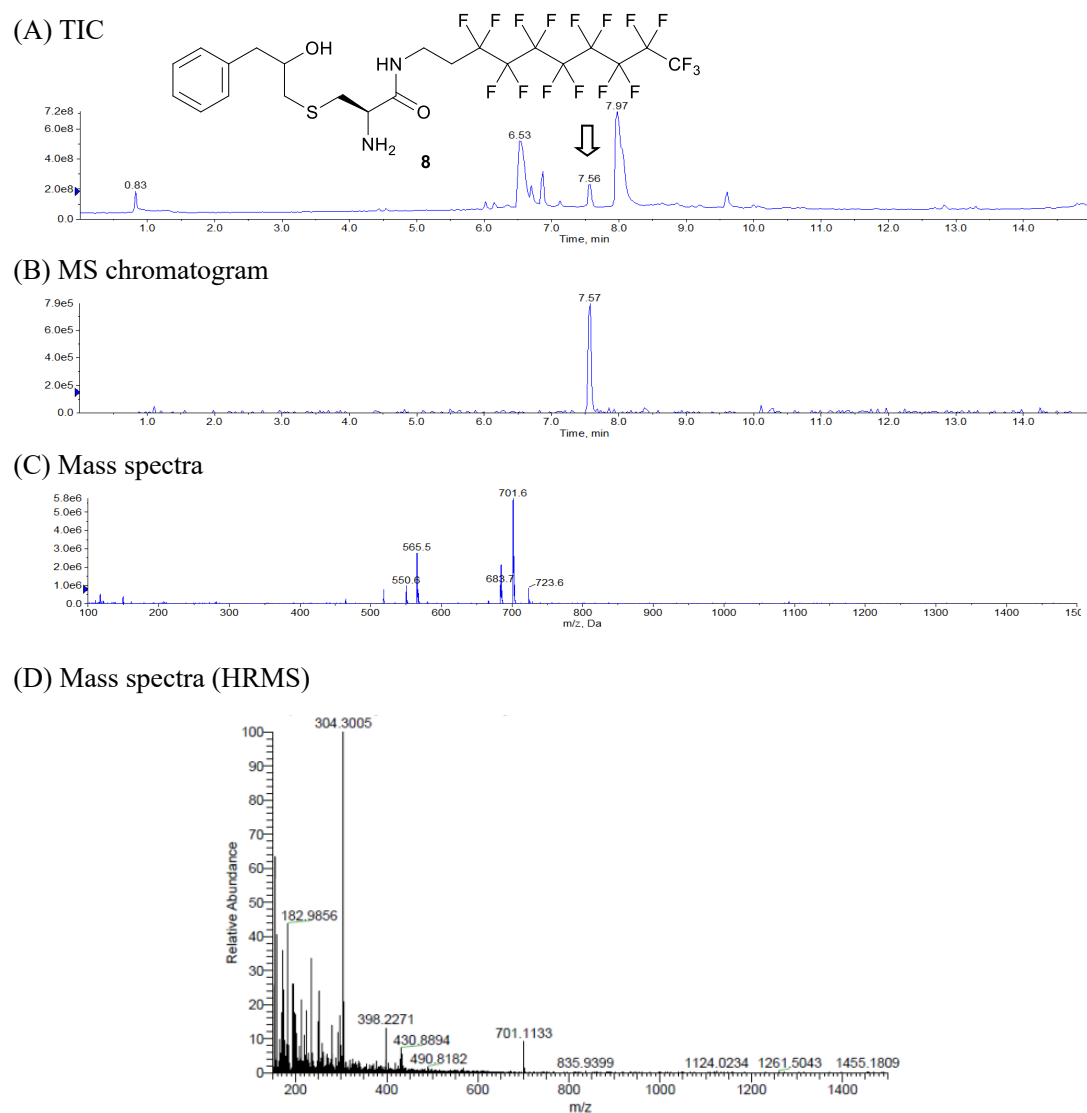

**Figure S7.** Chromatogram, proposed adduct structure and mass spectra of the reaction with Rf<sub>8</sub>CYS and (2,3-epoxypropyl)benzene in PBS/methanol=100/1. (A) Total ion chromatogram ( $m/z$  100 to 1500), (B) MS chromatogram ( $m/z$  701), (C) mass spectra of the adduct **8** (retention time 7.57 min). (D) HRMS (ESI) spectra of the adduct **8**  $[M+H]^+$  calculated for C<sub>22</sub>H<sub>22</sub>O<sub>2</sub>N<sub>2</sub>F<sub>17</sub>S 701.1131; found 701.1133.

**8** decomposed during purification and could not be isolated. The structure of **8** was proposed from the structure of a derivative **S8** synthesized by another method.

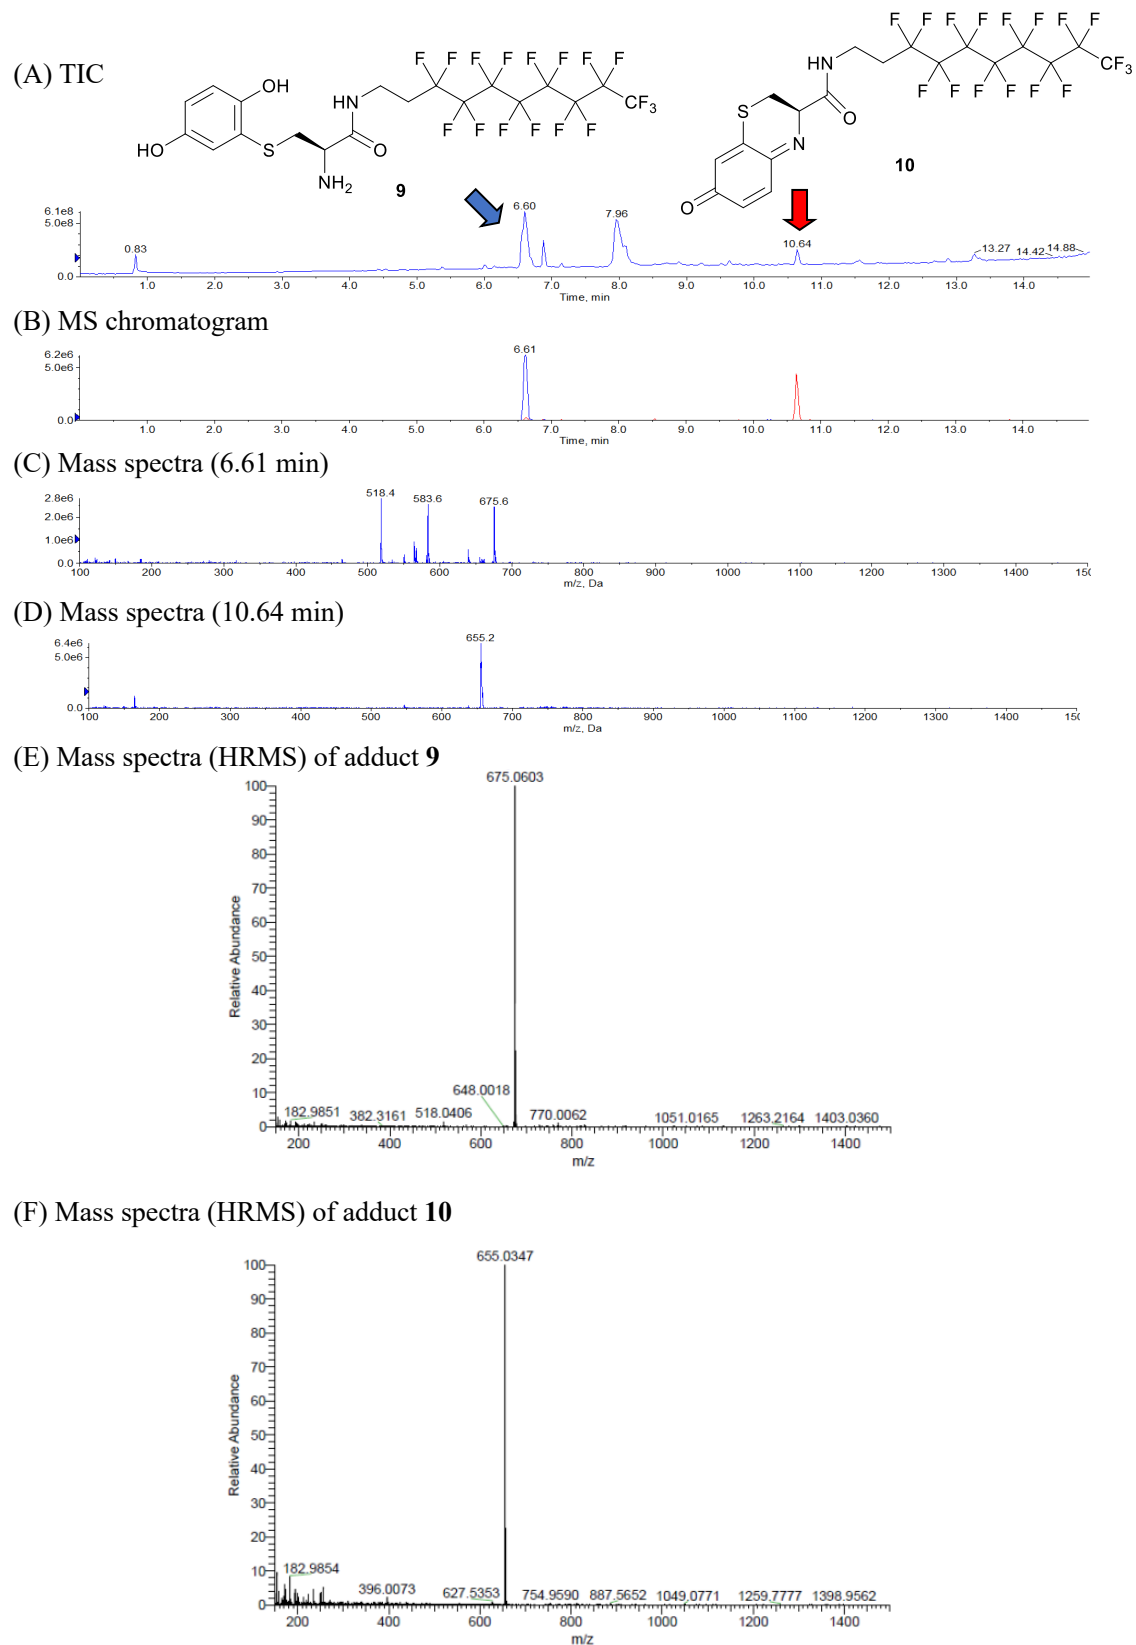

**Figure S8.** Chromatogram, proposed adduct structures and mass spectra of the reaction with Rf<sub>3</sub>CYS



and *p*-benzoquinone in PBS/methanol=100/1 (v/v). (A) Total ion chromatogram ( $m/z$  100 to 1500), (B) MS chromatogram (blue line:  $m/z$  675, red line: 655), (C) mass spectra of the adduct **9** (retention time 6.61 min), (D) mass spectra of the adduct **10** (retention time 10.64 min). (E) HRMS (ESI) spectra of the adduct **9**  $[M+H]^+$  calculated for  $C_{19}H_{16}O_3N_2F_{17}S$  675.0610; found 675.0603. (F) HRMS (ESI) spectra of the adduct **10**  $[M+H]^+$  calculated for  $C_{19}H_{12}O_2N_2F_{17}S$  655.0348; found 655.0347.

The structures of **10** were determined by comparing their retention times with those synthesized by other methods. **9** was eliminated over time and could not be isolated.

(A) TIC of control sample before F-SPE

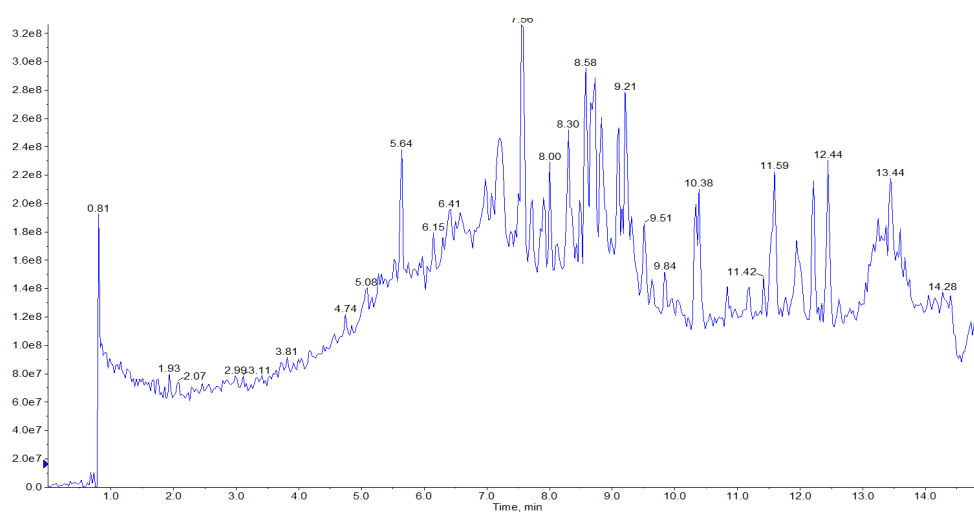

(B) TIC of control sample after F-SPE

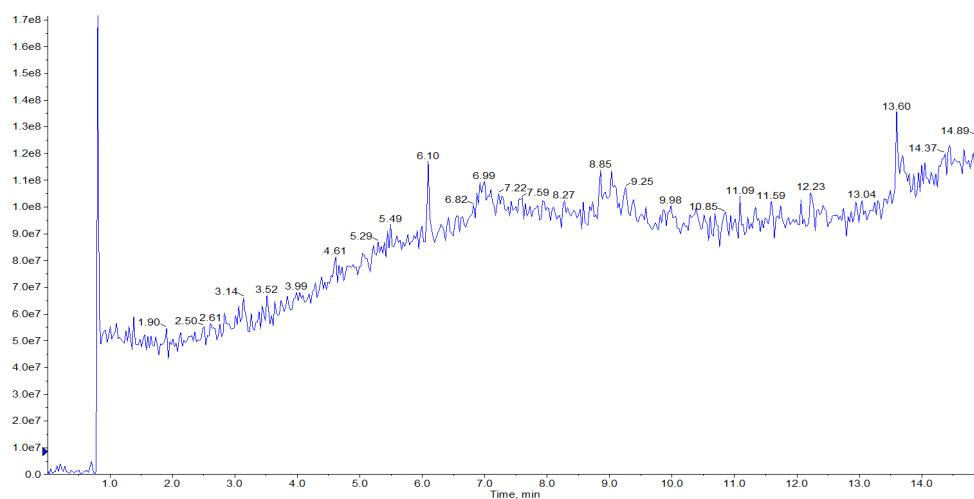

**Figure S9.** Total ion chromatogram ( $m/z$  100 to 1500) of a control sample (human liver microsomes (HLM), (1.0 mg/mL) fortified with a  $NADPH^+$  generating system at  $37^\circ C$  for 60 min) (A) before purification and (B) after purification using fluoros solid-phase extraction (F-SPE) method.

(A) TIC of control sample

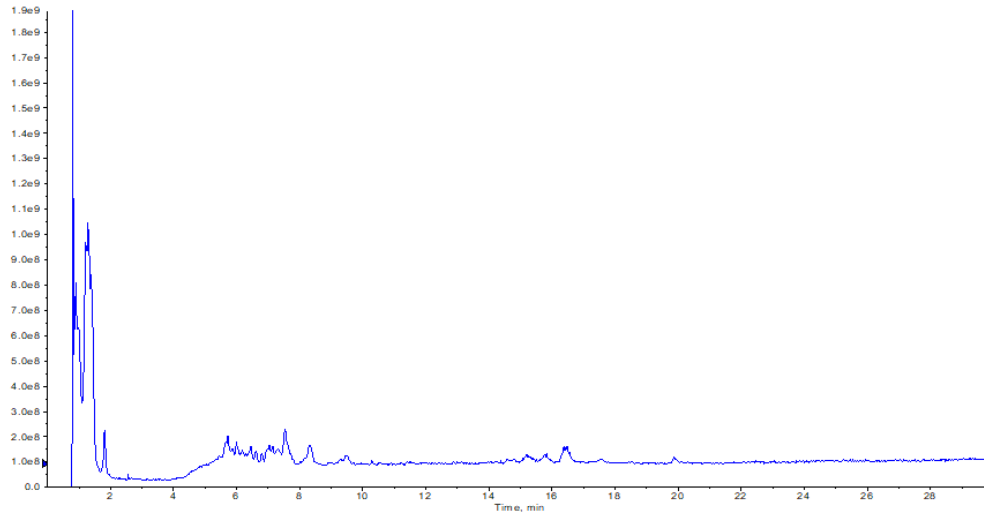

(B) TIC of adduct **3**

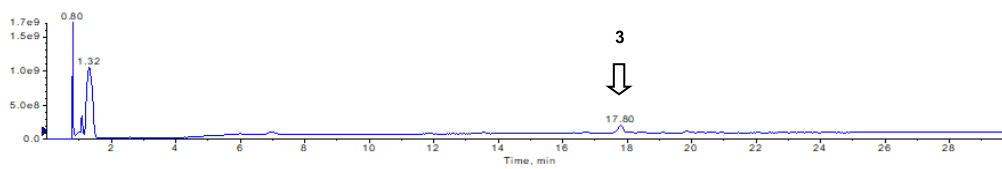

(C) MS chromatogram TIC of adduct **3**

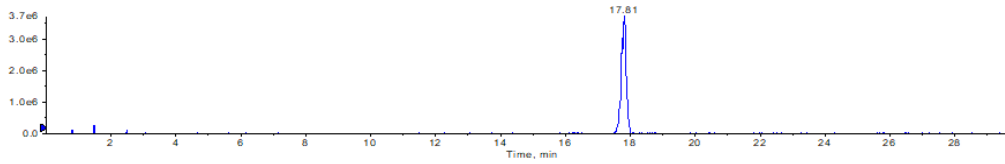

**Figure S10.** (A) Total ion chromatogram ( $m/z$  100 to 1500) of a control sample (HLM (1.0 mg/mL) fortified with a NADPH<sup>+</sup> generating system at 37°C for 60 min) using a direct injection method. (B) Total ion chromatogram ( $m/z$  100 to 1500) and (C) MS chromatogram ( $m/z$  655) of benzaldehyde adduct **3** (retention time 17.81 min) using a direct injection method.

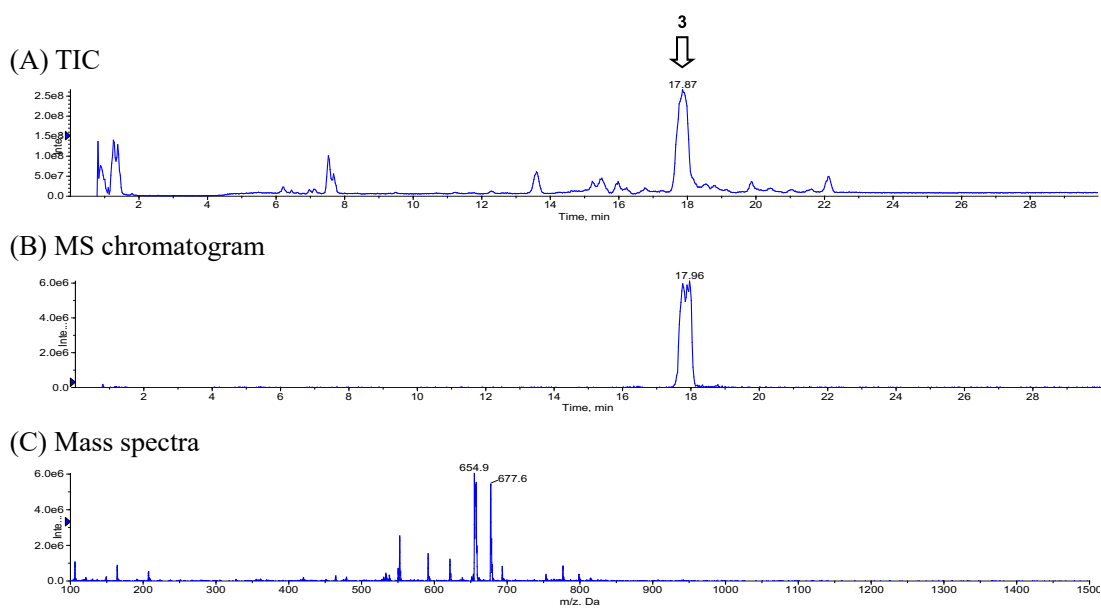

**Figure S11.** Chromatogram and mass spectra of the reaction with Rf<sub>8</sub>CYS and benzaldehyde in human liver microsome condition (Rf<sub>8</sub>CYS (150  $\mu$ M), benzaldehyde (150  $\mu$ M), HLM (1.0 mg/mL) fortified with a NADPH<sup>+</sup> generating system at 37°C for 60 min). (A) Total ion chromatogram ( $m/z$  600 to 700), (B) MS chromatogram ( $m/z$  655), (C) mass spectra of the adduct **3** (retention time 17.86 min) using a direct injection method.

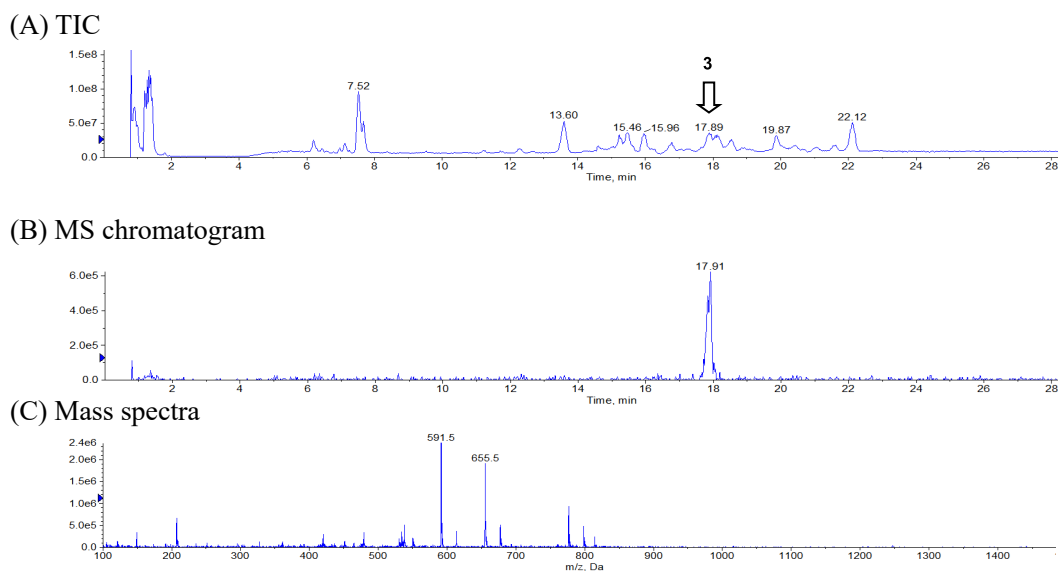

**Figure S12.** Chromatogram and mass spectra of microsomal incubations with benzyl alcohol and Rf<sub>8</sub>CYS. Benzyl alcohol (150  $\mu$ M) was incubated with Rf<sub>8</sub>CYS (150  $\mu$ M) in HLM (1.0 mg/mL) fortified with a NADPH<sup>+</sup> generating system at 37°C for 60 min. (A) Total ion chromatogram ( $m/z$  600 to 700), (B) MS chromatogram ( $m/z$  655), (C) mass spectra of the adduct **3** (retention time 17.91 min) using a direct injection method.

(A) TIC of control sample (without NADPH<sup>+</sup>)

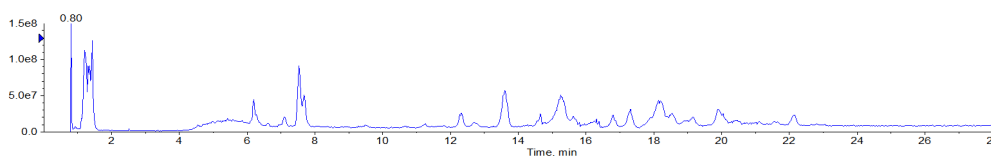

**Figure S13.** Total ion chromatogram ( $m/z$  600 to 700) of control sample (benzyl alcohol (150  $\mu$ M), Rf<sub>8</sub>CYS (150  $\mu$ M), HLM (1.0 mg/mL) without a NADPH<sup>+</sup> generating system at 37°C for 60 min) using a direct injection method.

(A) TIC of control sample (without benzyl alcohol)

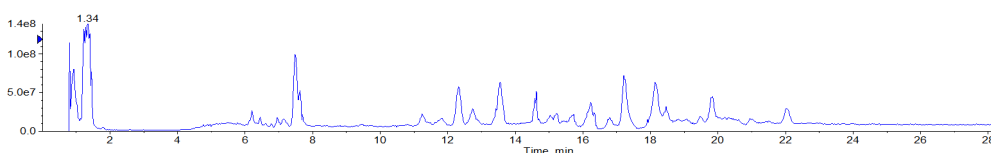

**Figure S14.** Total ion chromatogram ( $m/z$  600 to 700) of a control sample (Rf<sub>8</sub>CYS (150  $\mu$ M), HLM (1.0 mg/mL) fortified with a NADPH<sup>+</sup> generating system at 37°C for 60 min) using a direct injection method.

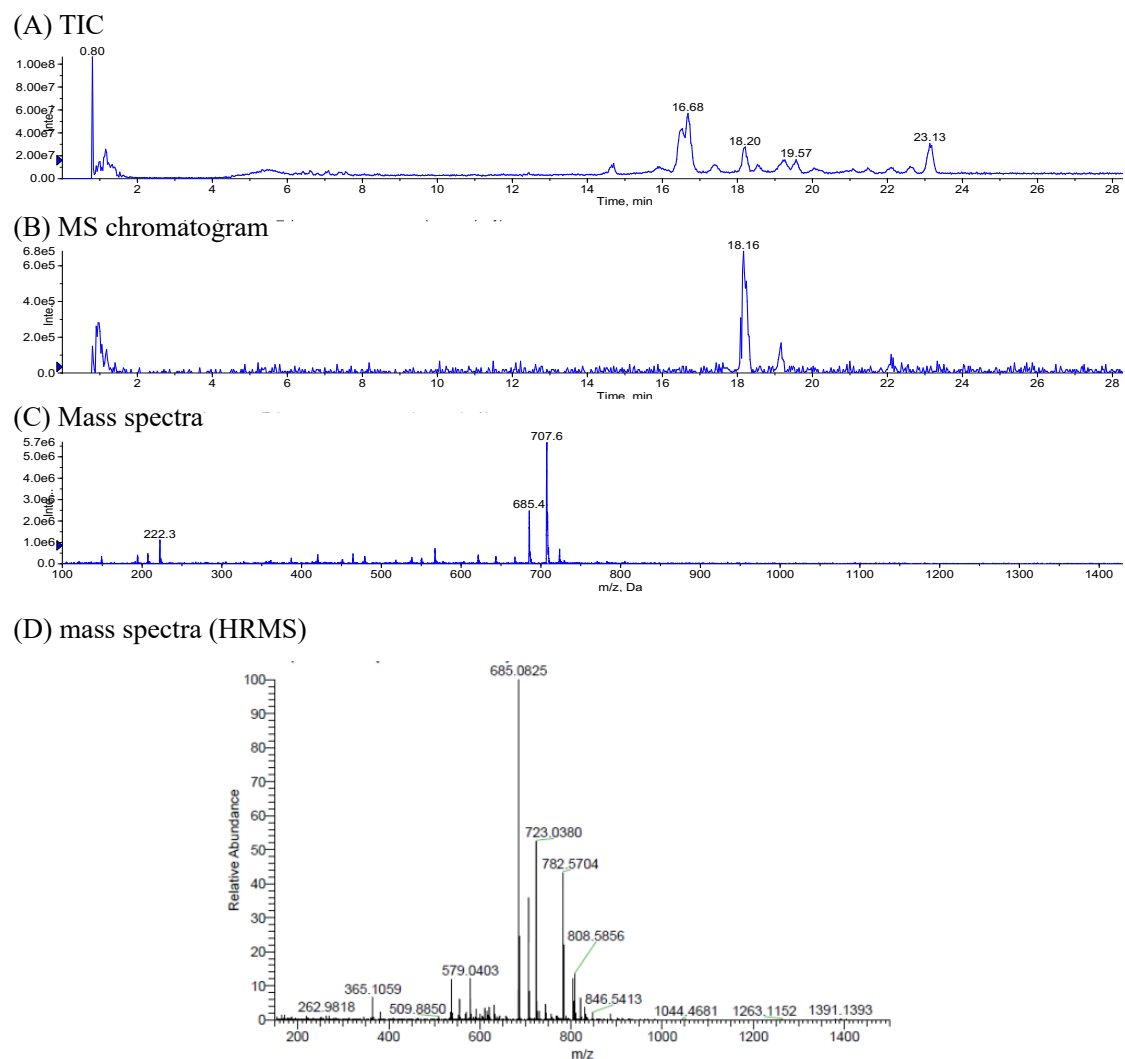

**Figure S15.** Chromatograms and mass spectra of microsomal incubations with ethynylbenzene and Rf<sub>8</sub>CYS. Ethynylbenzene (150  $\mu$ M) was incubated with Rf<sub>8</sub>CYS (150  $\mu$ M) in HLM (1.0 mg/mL) fortified with a NADPH<sup>+</sup> generating system at 37°C for 60 min. (A) Total ion chromatogram ( $m/z$  650 to 700), (B) MS chromatogram ( $m/z$  685), (C) mass spectra of the adduct (retention time 18.16 min) using a direct injection method. (D) HRMS (ESI) spectra of the adduct [M+H]<sup>+</sup> calculated for C<sub>21</sub>H<sub>18</sub>O<sub>2</sub>N<sub>2</sub>F<sub>17</sub>S 685.0812; found 685.0825.

(A) TIC

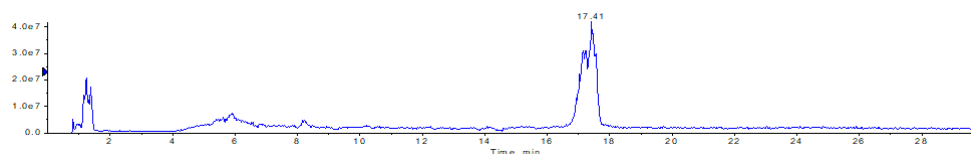

(B) MS chromatogram

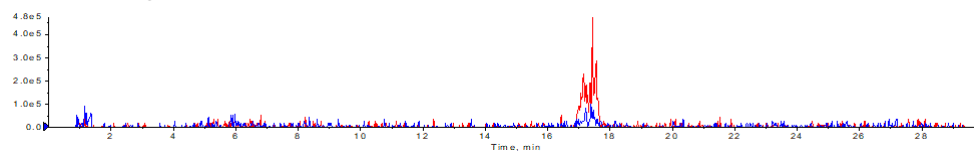

(C) Mass spectra

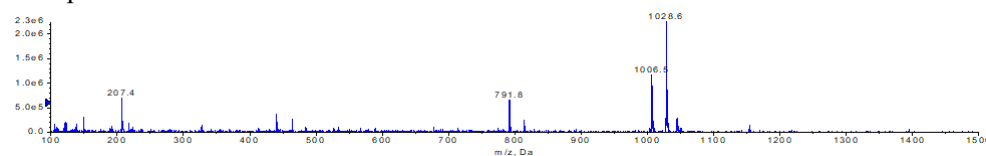

(D) Mass spectra (HRMS)

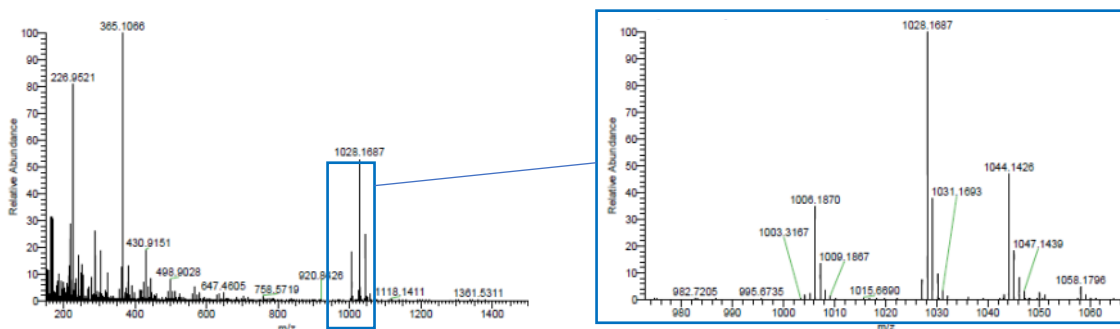

**Figure S16.** Chromatograms and mass spectra of microsomal incubations with troglitazone and Rf<sub>8</sub>CYS. Troglitazone (150  $\mu$ M) was incubated with Rf<sub>8</sub>CYS (150  $\mu$ M) in HLM (1.0 mg/mL) fortified with a NADPH<sup>+</sup> generating system at 37°C for 60 min. (A) Total ion chromatogram ( $m/z$  1000 to 1050), (B) MS chromatogram (blue line:  $m/z$  1006, red line: 1028), (C) mass spectra of the adduct (retention time 17.41 min) using a direct injection method. (D) HRMS (ESI) spectra of the adduct [ $M+H$ ]<sup>+</sup> calculated for C<sub>37</sub>H<sub>37</sub>O<sub>6</sub>N<sub>3</sub>F<sub>17</sub>S<sub>2</sub> 1006.1852; found 1006.1870 and [ $M+Na$ ]<sup>+</sup> calculated for C<sub>37</sub>H<sub>36</sub>O<sub>6</sub>N<sub>3</sub>F<sub>17</sub>NaS<sub>2</sub> 1028.1672; found 1028.1687.

(A) TIC

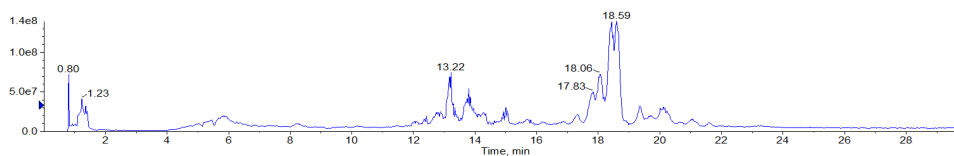

(B) MS chromatogram

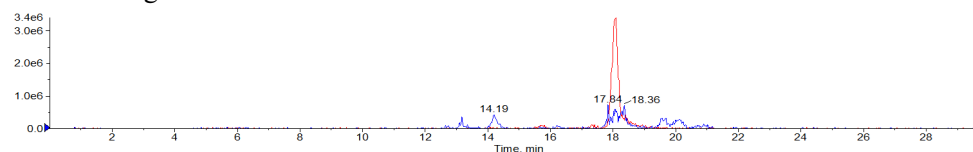

(C) Mass spectra

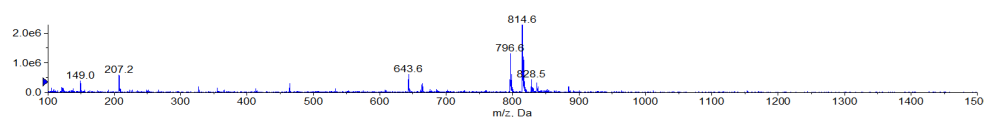

(D) Mass spectra (HRMS) of adduct (MS 828)

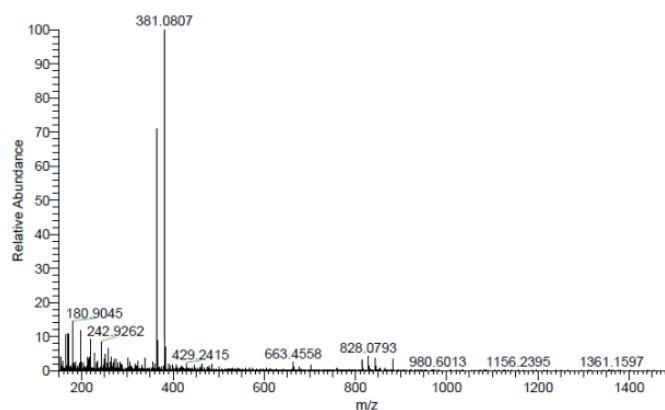

(E) Mass spectra (HRMS) of adduct (MS 814)

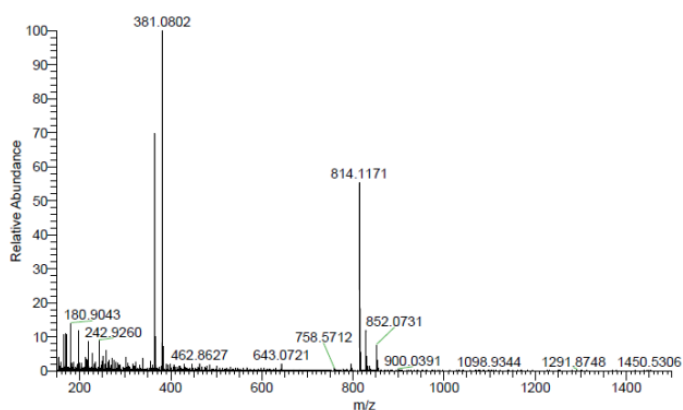

**Figure S17.** Chromatograms and mass spectra of microsomal incubations with ticlopidine and Rf<sub>8</sub>CYS. Ticlopidine (150  $\mu$ M) was incubated with Rf<sub>8</sub>CYS (150  $\mu$ M) in HLM (1.0 mg/mL) fortified with NADPH<sup>+</sup> generating system at 37°C for 60 min. (A) Total ion chromatogram ( $m/z$  800 to 900),

(B) MS chromatogram (blue line:  $m/z$  828, red line: 814), (C) mass spectra of the adduct (retention time 18.14 min) using a direct injection method. (D) HRMS (ESI) spectra of the adduct  $[M+H]^+$  calculated for  $C_{27}H_{24}ON_3ClF_{17}S_2$  828.0778; found 828.0793 and (E) HRMS (ESI) spectra of the adduct  $[M+H]^+$  calculated for  $C_{27}H_{26}O_2N_3ClF_{17}S$  814.1163; found 814.1171.

(A) TIC

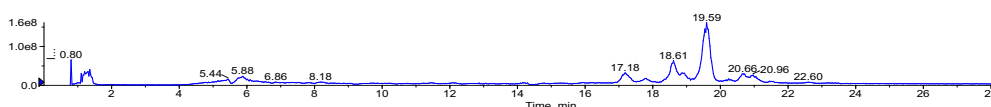

(B) MS chromatogram

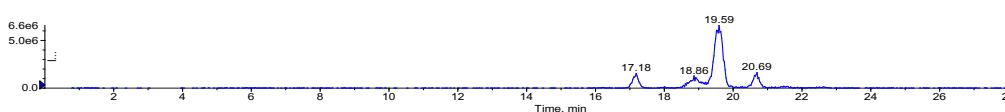

(C) Mass spectra

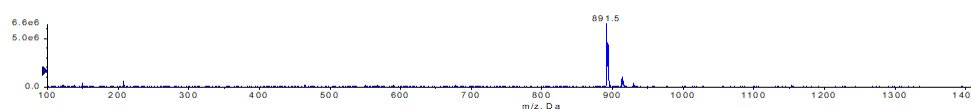

(D) Mass spectra (HRMS)

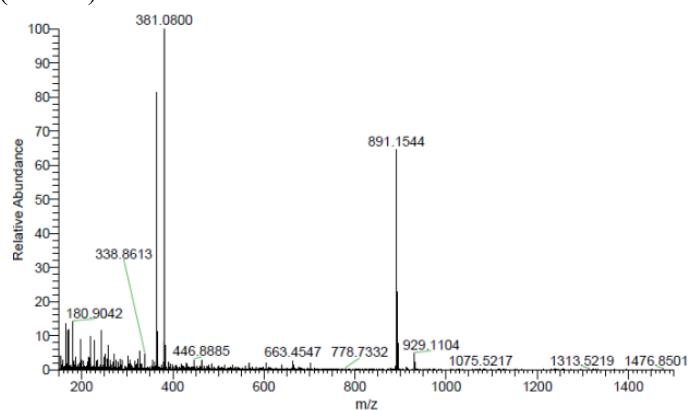

**Figure S18.** Chromatograms and mass spectra of microsomal incubations with clozapine and Rf<sub>8</sub>CYS. Clozapine (150  $\mu$ M) was incubated with Rf<sub>8</sub>CYS (150  $\mu$ M) in HLM (1.0 mg/mL) fortified with a NADPH<sup>+</sup> generating system at 37°C for 60 min. (A) Total ion chromatogram ( $m/z$  850 to 950), (B) MS chromatogram ( $m/z$  891), (C) mass spectra of the adduct (retention time 19.59 min) using a direct injection method. (D) HRMS (ESI) spectra of the adduct  $[M+H]^+$  calculated for  $C_{31}H_{29}ON_6ClF_{17}S$  891.1541; found 891.1544.



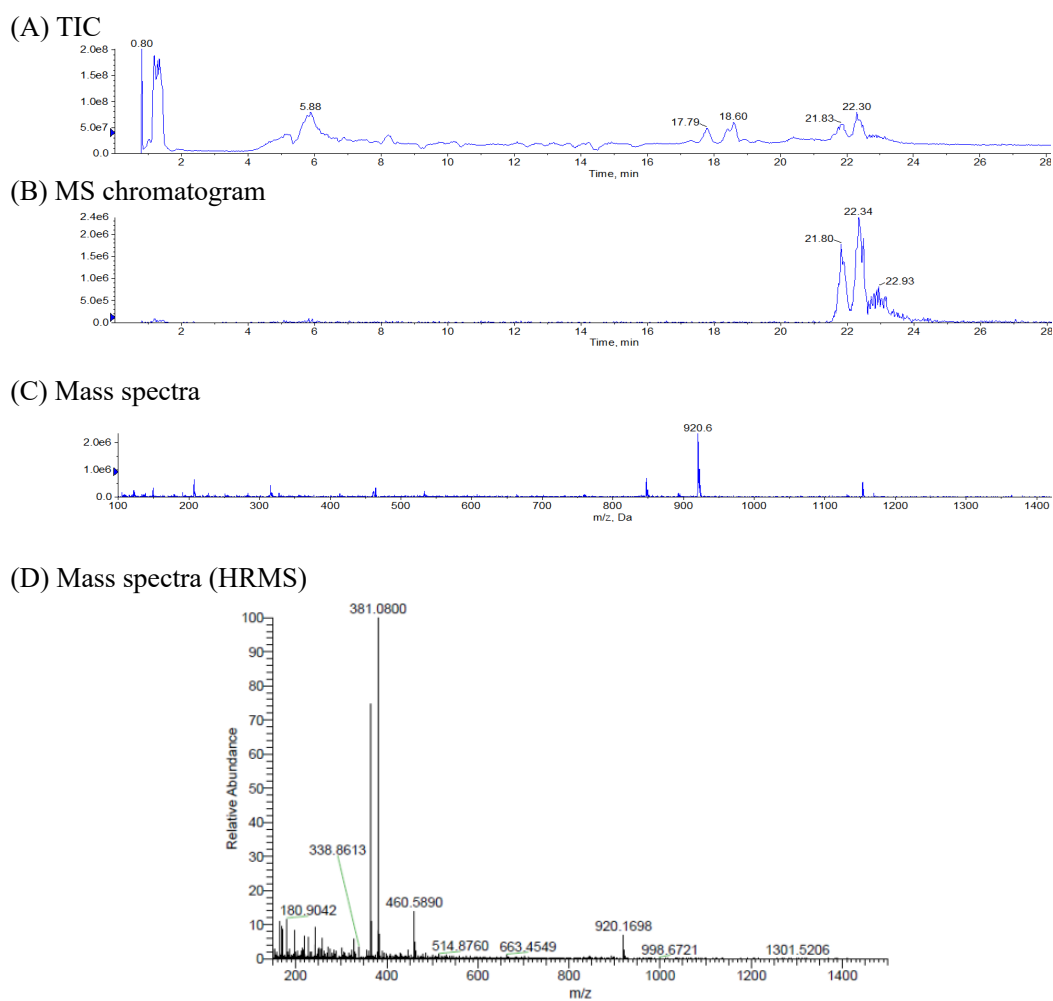

**Figure S19.** Chromatograms and mass spectra of microsomal incubations with amodiaquine dihydrochloride dihydrate and Rf<sub>8</sub>CYS. Amodiaquine dihydrochloride dihydrate (150  $\mu$ M) was incubated with Rf<sub>8</sub>CYS (150  $\mu$ M) in HLM (1.0 mg/mL) fortified with a NADPH<sup>+</sup> generating system at 37°C for 60 min. (A) Total ion chromatogram ( $m/z$  830 to 1300), (B) MS chromatogram ( $m/z$  920), (C) mass spectra of the adduct (retention time 22.34 min) using a direct injection method. (D) HRMS (ESI) spectra of the adduct  $[M+H]^+$  calculated for C<sub>33</sub>H<sub>32</sub>O<sub>2</sub>N<sub>5</sub>ClF<sub>17</sub>S 920.1694; found 920.1698.

(A) TIC

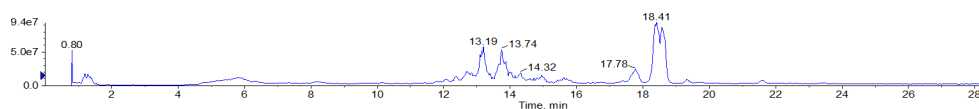

(B) MS chromatogram

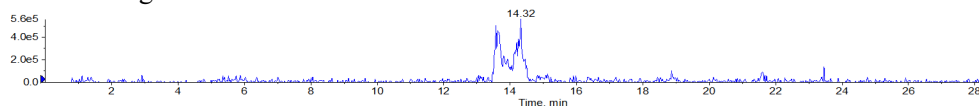

(C) Mass spectra

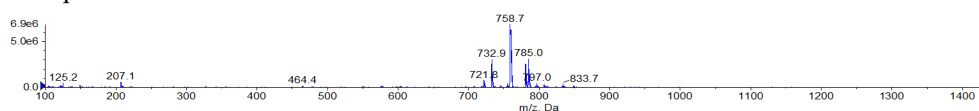

(D) Mass spectra (HRMS)

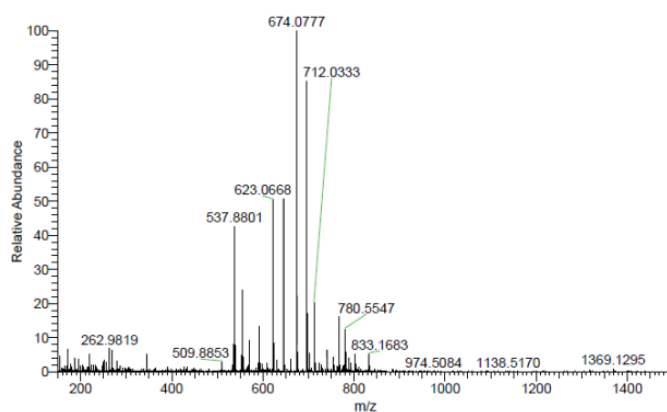

**Figure S20.** Chromatograms and mass spectra of microsomal incubations with abacavir and Rf<sub>8</sub>CYS. Abacavir (150  $\mu$ M) was incubated with Rf<sub>8</sub>CYS (150  $\mu$ M) in HLM (1.0 mg/mL) fortified with a NADPH<sup>+</sup> generating system at 37°C for 60 min. (A) Total ion chromatogram ( $m/z$  800 to 850), (B) MS chromatogram ( $m/z$  833), (C) mass spectra of the adduct (retention time 14.32 min) using a direct injection method. (D) HRMS (ESI) spectra of the adduct  $[M+H]^+$  calculated for C<sub>27</sub>H<sub>26</sub>ON<sub>8</sub>F<sub>17</sub>S 833.1679; found 833.1683.

(A) TIC

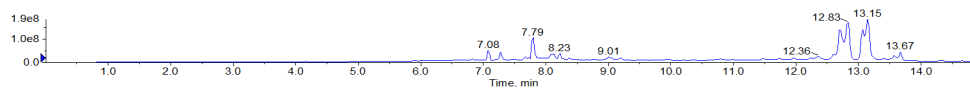

(B) MS chromatogram

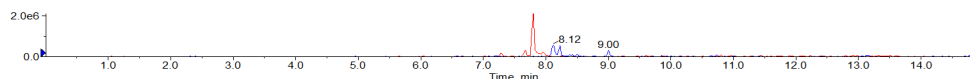

(C) Mass spectra (8.12 min)

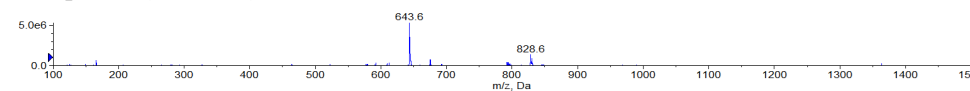

(D) Mass spectra (7.79 min)

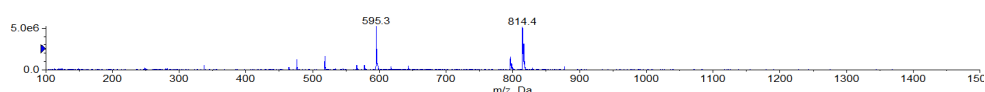

(E) Mass spectra (HRMS) of adduct (MS 828)

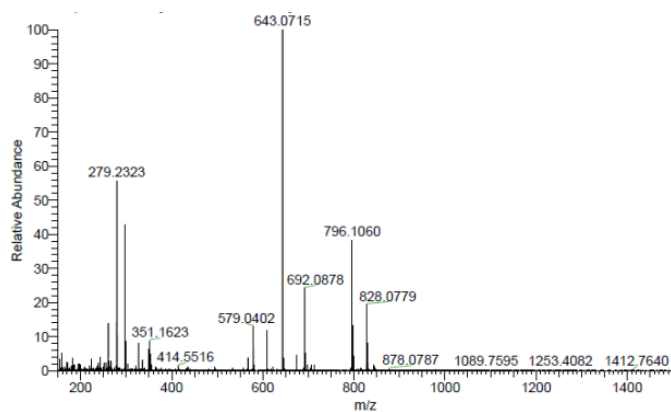

(F) Mass spectra (HRMS) of adduct (MS 814)

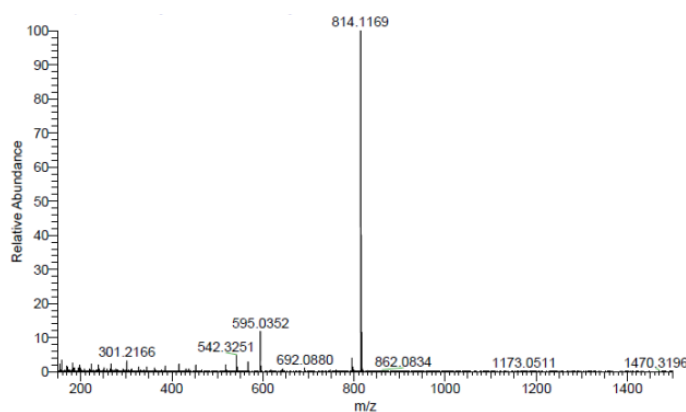

**Figure S21.** Chromatograms and mass spectra of microsomal incubations with ticlopidine and Rf<sub>8</sub>CYS. Ticlopidine (150  $\mu$ M) was incubated with Rf<sub>8</sub>CYS (150  $\mu$ M) in HLM (1.0 mg/mL) fortified with a NADPH<sup>+</sup> generating system at 37°C for 60 min. (A) Total ion chromatogram ( $m/z$  800 to 900),

(B) MS chromatogram (blue line:  $m/z$  828, red line: 814), (C) mass spectra of the adduct (retention time 8.12 min) (D) mass spectra of the adduct (retention time 7.79 min) after purification using F-SPE method. (D) HRMS (ESI) spectra of the adduct  $[M+H]^+$  calculated for  $C_{27}H_{24}ON_3ClF_{17}S_2$  828.0778; found 828.0779, (E) HRMS (ESI) spectra of the adduct  $[M+H]^+$  calculated for  $C_{27}H_{26}O_2N_3ClF_{17}S$  814.1163; found 814.1169.

**Thiophenes (P450 catalysed metabolism)**

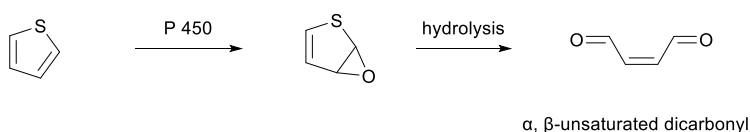

**Proposed structure of adduct with ticlopidine ( $M+Rf_8CYS-S+O$ )**

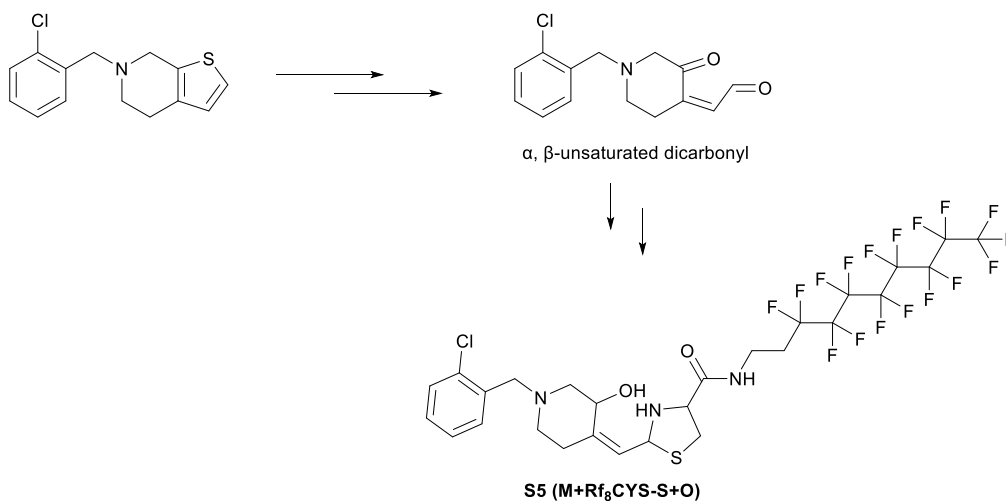

**Scheme S3.** Metabolic pathway of thiophene and proposed structure of adduct ( $M+Rf_8CYS-S+O$ ) Thiophene is bio-activated to form an electrophilic  $\alpha,\beta$ -unsaturated dicarbonyl.<sup>1</sup> Given the proposed metabolite of thiophene, the structure of ( $M+Rf_8CYS-S+O$ ) was determined to be **S5**.

## MS/HRMS spectra of adduct (M+Rf<sub>8</sub>CYS-S+O)

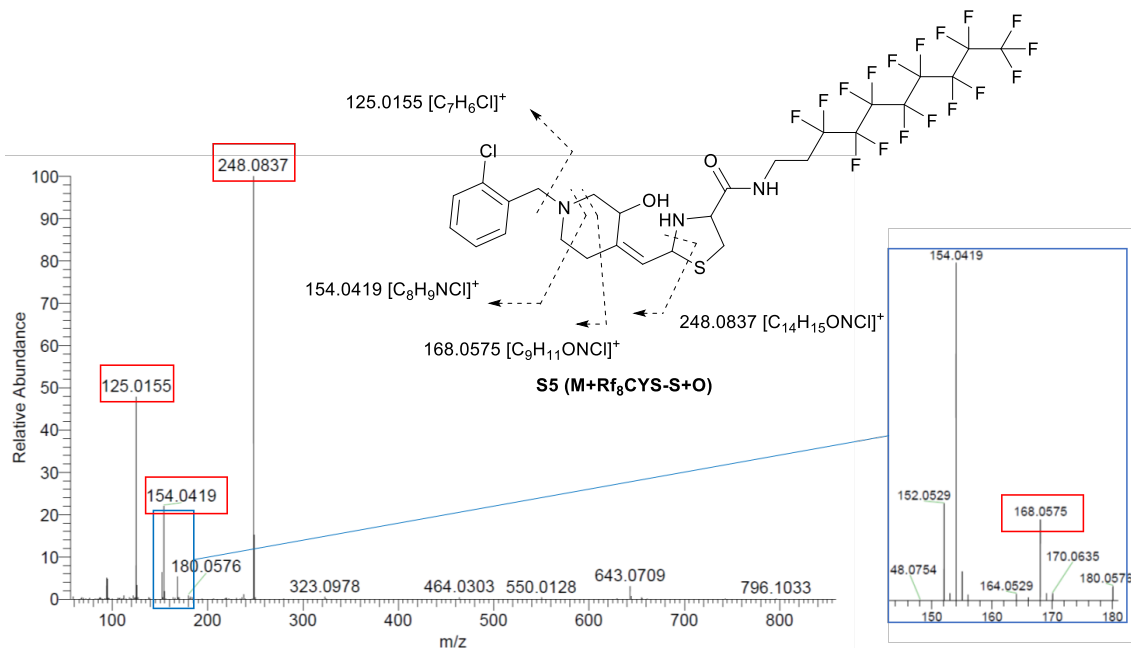

**Figure S22.** Tandem mass spectra of the positive enhanced product ion scanning of  $m/z$  814 of microsomal incubations with ticlopidine and Rf<sub>8</sub>CYS. Ticlopidine (150  $\mu$ M) was incubated with Rf<sub>8</sub>CYS (150  $\mu$ M) in HLM (1.0 mg/mL) fortified with a NADPH<sup>+</sup> generating system at 37°C for 60 min. Product ions of (M+Rf<sub>8</sub>CYS-S+O) was found; [M+H]<sup>+</sup> calculated for C<sub>7</sub>H<sub>6</sub>Cl 125.0153; found 125.0155, calculated for C<sub>8</sub>H<sub>9</sub>NCl 154.0418; found 154.0419, calculated for C<sub>9</sub>H<sub>11</sub>ONCl 168.0575; found 168.0575, calculated for C<sub>14</sub>H<sub>15</sub>ONCl 248.0837; found 248.0837. The C<sub>14</sub>H<sub>15</sub>ONCl fragment was considered to be formed by a cleavage of the thiazolidine ring.<sup>2,3</sup> All assigned fragments were consistent with the proposed structure of S5.

## 2. Experimental procedures

### Preparation of Rf<sub>8</sub>CYS solution

A mixture of Rf<sub>8</sub>CYS-TFA and S2 in methanol or dimethyl sulfoxide (DMSO) (31.5 mmol/L as monomer) and TCEP-HCl aqueous solution (200 mmol/L) was mixed in the ratio of 19/1 (v/v). After 60 min, the solution was used as the Rf<sub>8</sub>CYS solution (30 mmol/L).

### Preparation of 2 solution (for Figure S1 and S3)

A mixture of 2-TFA and S4 in methanol (31.5 mmol/L as monomer) and TCEP-HCl aqueous solution (200 mmol/L) was mixed in the ratio of 19/1 (v/v). After 60 min, the solution was used as 2 solution (30 mmol/L).

### **Reaction method in aqueous solution (for Figure S1–S8)**

The substrate (150  $\mu$ M) was mixed with Rf<sub>8</sub>CYS or **2** (150  $\mu$ M) in PBS (100 mmol/L, pH 7.4). Although the substrate and trapping reagent were prepared using methanol or DMSO, the organic solvent concentration was less than 1% in the reaction mixture. The total volume was 202  $\mu$ L. After 60 min at 37°C, 600  $\mu$ L of 0.1% formic acid aqueous solution /acetonitrile=1/2 (v/v) was added to the mixture and the sample was analyzed by a liquid chromatography or F-SPE then performance liquid chromatography.

### **Trapping assay in HLM condition (for Figure S9–S21)**

The incubation mixture contained the individual substrates (150  $\mu$ M), HLM (1.0 mg/mL), G6P (3.3 mmol/L), G6P-DH (0.45 unit/mL), MgCl<sub>2</sub> (3.3 mmol/L), NADP<sup>+</sup> (1.3 mmol/L) and Rf<sub>8</sub>CYS (150  $\mu$ M) at the final concentrations in 100 mmol/L potassium phosphate buffer (pH 7.4). The total volume was 202  $\mu$ L. Although the substrate and Rf<sub>8</sub>CYS were prepared using DMSO, the concentration was less than 1% in the reaction mixture. After 60 min incubation at 37°C, 200  $\mu$ L of 0.1% formic acid containing acetonitrile was added to quench the reaction. After centrifugation for 5 min at 4°C and 10,000 rpm, the supernatant was analyzed by liquid chromatography using a fluoruous LC column directly (direct injection method) or using a non-fluoruous LC column after F-SPE (F-SPE method).

### **Method for F-SPE (for Figure S9 and S21)**

Fluoruous silica gel, 500 mg was loaded in a spin column and prewashed by 1 mL of methanol three times followed by 1 mL of 80% methanol/water (v/v) three times. 300  $\mu$ L of the sample was then slowly loaded on the spin column. After washing with 700  $\mu$ L of 80% methanol/water three times, the fluoruous compound was eluted by 2.1 mL of methanol. The sample was then dried by SpeedVac and reconstituted in 300  $\mu$ L of 50% acetonitrile/water (v/v) for LC/MS analysis.

### **Instrumentation and conditions**

A Shimadzu (Japan) LC system comprising two LC-20AD pumps as well as a high-pressure gradient unit, a DGU-20A5 on-line degasser, an SIL-20AC autosampler, and a CTO-20AC column oven were used. Injections of 10  $\mu$ L samples were carried out automatically.

### **LC condition using a non-fluoruous column (for Figure S1–S8 and S21)**

CAPCELL CORE AQ, (2.7  $\mu$ m, 2.1 ID×50 mm OSAKA SODA CO., LTD, Japan) was used. Solvent A (purified water/formic acid=1000/1, v/v) and solvent B (acetonitrile/formic acid=1000/1, v/v) were used as the mobile phases for the gradient elution (gradient curve: 0-1 min, 10% B; 1-15 min, linear change from 10 to 95% B; 16-17 min, linear change from 95 to 10% B; run-time, 20 min). The flow

rate was set at 0.6 mL/min, and the column oven temperature was set at 40 °C. The eluent from the LC column was directly introduced into the ion source of the mass spectrometer.

#### **LC condition using fluorous column (for Figure S10–S20)**

A Wakopak Fluofix-II 120E column (5 μm, 2.0 ID×150 mm., WAKO, Japan) was used. Solvents A (1 M ammonium acetate aqueous solution /acetic acid/water=10/1/1000, v/v/v) and solvent B (1 M ammonium acetate aqueous solution /acetic acid/methanol/2-propanol = 10/1/800/200, v/v/v/v) were used as the mobile phases for the gradient elution (gradient curve: 0-1 min, 10% B; 1-3 min, linear change from 10 to 70% B; 3-25 min, linear change from 70 to 90% B; 35.0-35.1 min, linear change from 90 to 10% B; run-time, 37 min). The flow rate was set at 0.3 mL/min, and the column oven temperature was set at 40°C. The effluent from the LC column was directly introduced into the ion source of the mass spectrometer.

An API 4000 Qtrap tandem mass spectrometer (Sciex, USA) was used for MS measurements. For the identification of the adducts, the full scan mode was operated in the positive ion spray ionization mode. The full scan over the *m/z* range of 100-1500 was performed under the following the operating conditions: an ion spray voltage of 3500 V, a source temperature of 750°C, curtain gas of 10, an ion source gas 1 pressure of 70, and ion source gas 2 setting of 80.

A Q Exactive mass spectrometry (Thermo Fisher Scientific Inc, Germany) was used for High resolution mass spectra (HRMS). For the identification of the adducts, the full scan mode was operated in the positive ion spray ionization mode. The full scan over the *m/z* range of 100-1500 was performed under the following the operating conditions: a spray voltage of 3.5 kV, capillary temperature of 275 °C, aux gas heater temperature of 450 °C, S-Lens RF level of 50, sheath gas of 55, auxiliary gas of 15, and sweep gas setting of 3.

In addition, structural characterization of the ticlopidine RMs-adduct (M+Rf8CYS-S+O) using the MS/HRMS fragments obtained in the product ion mode using the respective identified precursor ion with positive mode.

#### **General information**

All solvents and reagents were purchased from commercial sources and used without additional purifications. 1H,1H,2H,2H-Perfluorodecylamine was obtained from Manchester Organics Limited (UK). TFA, 4-(4,6-dimethoxy-1,3,5-triazin-2-yl)-4-methylmorpholinium chloride (DMT-MM), clozapine, amodiaquine dihydrochloride dihydrate and abacavir were obtained from Tokyo Chemical Industry (Japan). N-(tert-butoxycarbonyl)-S-trityl-L-cysteine, *p*-benzoquinone, benzaldehyde, decylamine, triethylsilane, ethynylbenzene and (2,3-epoxypropyl)benzene were obtained from Sigma

Aldrich (USA). LC/MS grade 2-propanol, formic acid, acetic anhydride (Ac<sub>2</sub>O), dipotassium hydrogenphosphate, TCEP-HCl, troglitazone, and potassium dihydrogenphosphate were obtained from Fujifilm Wako (Japan). Benzyl alcohol was obtained from Nacalai Tesque (Japan). 2-Phenyl-1,3-thiazolane-4-carboxylic acid was obtained from Matrix Scientific (USA). 3,4-Thiazolidinedicarboxylic acid and 2-phenyl-,3-(1,1-dimethylethyl) ester were obtained from Amatek Chemical (China). XTreme 200 mixed gender human liver microsomes - 0.5mL (20 mg/mL) was obtained from Xeno Tech (USA). LC/MS grade acetonitrile, Tetrahydrofuran (THF) triethylamine, ethyl acetate and HPLC grade methanol were obtained from Kanto Chemical (Japan). Corning gentest NADPH<sup>+</sup> system solution A and Corning gentest NADPH<sup>+</sup> system solution B were obtained from Corning (USA). Ultrapure water was produced using a Milli-Q.

<sup>1</sup>H, <sup>13</sup>C and <sup>19</sup>F NMR spectra were recorded on Agilent Technologies DD2 500 MHz FT-NMR spectrometer and JEOL ECZ600. CD<sub>3</sub>OD, DMSO-d<sub>6</sub> and CDCl<sub>3</sub> were used as a solvent. TMS was used as an internal standard. The chemical shifts were reported in ppm downfield (δ) from TMS, the coupling constants *J* are given in Hz. The peak patterns are indicated as follows: s, singlet; d, doublet; t, triplet; q, quartet; m, multiplet; brs, broad singlet. TLC was carried out on SiO<sub>2</sub> (silica gel 60 F254, Merck, Germany), and the spots were located with UV light. F-SPE was carried out on fluoroSep-RP Octyl (particle size 5µm pore Size 60, ES INDUSTRIES, USA).

#### **Method for the synthesis of Rf<sub>8</sub>CYS-TFA**

To a stirred solution of N-(tert-butoxycarbonyl)-S-trityl-L-cysteine (2.6 mmol, 1.2 g) in acetonitrile (35 mL), 1H,1H,2H,2H-perfluorodecylamine (2.2 mmol, 600 µL) and DMT-MM (4.4 mmol, 1.2 g) were added and the reaction was allowed to stir at room temperature for 18 h. After completion (monitored by TLC), 8 mL of water was added to reaction mixture and all the mixture were loaded to a fluoruous silica gel cartridge. After washing by 120 mL of 80% methanol/water, **S1** was eluted by ethyl acetate to afford as a white solid in (1.88 g, 95% yield).

To a stirred solution of **S1** (1.1 mmol, 1 g) in THF (4.5 mL), triethylsilane, (1 mL) and TFA (4.5 mL) were added and the reaction was allowed to stir at room temperature for 22 h. After concentration in vacuo, the resulting residue was purified using a Waters Prep System (Waters Corporation, USA) equipped with an XTerra Prep MS C18 OBD 5 µm 30ID×50 mm (Waters Corporation) to afford the mixture of Rf<sub>8</sub>CYS-TFA and **S2** as a white gam in (301 mg, 41% yield). Solvents A (TFA /water=1/1000, v/v) and solvent B (TFA/acetonitrile = 1/1000, v/v) were used as the mobile phases for the gradient elution (gradient curve: 30-70% B for 8 min, followed by 100% B for another 2 min (run-time, 10 min)). The flow rate was set at 40.0 mL/min. Rf<sub>8</sub>CYS-TFA was dimerized to disulfide form **S2** during refrigerated storage.

Rf<sub>8</sub>CYS-TFA; δ<sub>H</sub> (500 MHz, CD<sub>3</sub>OD); 3.99 (1H, dd, *J* = 8.0, 11.2 Hz), 3.68-3.52 (3H, m), 2.99 (2H,



ddd,  $J = 11.2, 24.0, 34.4$  Hz), 2.57-2.42 (4H, m)  $\delta_C$  (126 MHz,  $CD_3OD$ ); 168.68, 168.51, 56.11, 52.91, 39.01, 33.07, 31.39, 31.22, 31.05, 26.16, -0.05;  $\delta_F$  (470 MHz,  $CD_3OD$ ); -82.32, -82.48, -115.12, -115.48, -122.57, -122.69, -122.92, -123.06, -123.65, -123.877, -123.87, -124.53, 124.64, 124.74, 127.20, 127.41; HRMS (ESI)  $[M+H]^+$  calcd. for  $C_{13}H_{12}ON_2F_{17}S$  567.0399; found 567.0412.

**S2**;  $\delta_H$  (600 MHz,  $CD_3OD$ ); 4.21 (2H, dd,  $J = 7.2, 11.2$  Hz), 3.60-3.54 (6H, m), 3.34 (4H, ddd,  $J = 8.0, 19.2, 156.0$  Hz), 2.47-2.41 (8H, m); HRMS (ESI)  $[M+H]^+$  calcd. for  $C_{26}H_{21}O_2N_4F_{34}S_2$  1131.0558; found 1131.0553.

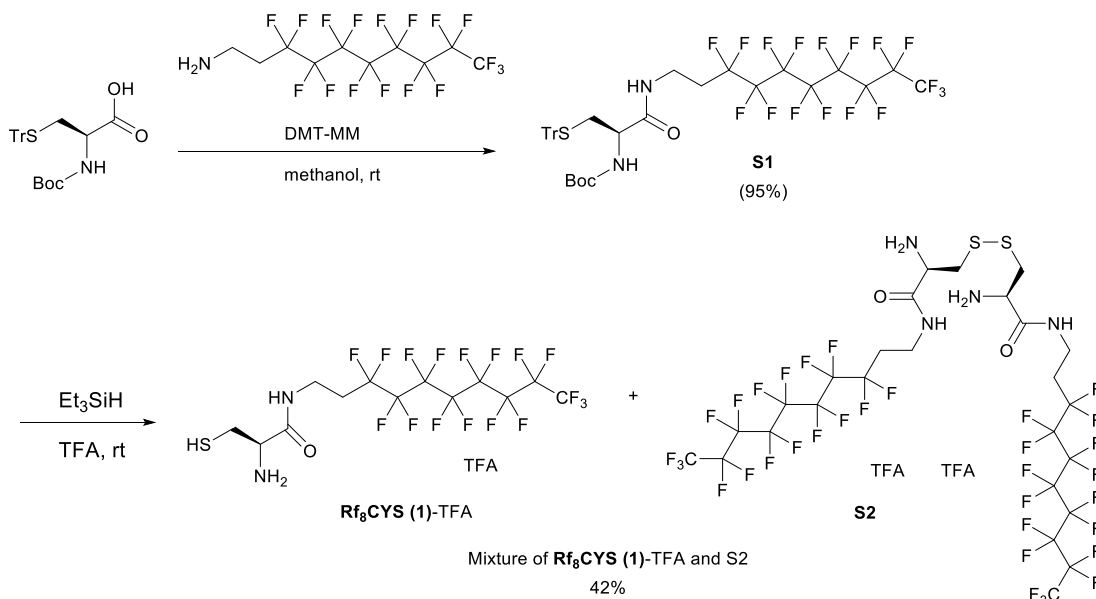

### Method for the synthesis of 2-TFA

To a stirred solution of *N*-(*tert*-butoxycarbonyl)-*S*-trityl-L-cysteine (1 mmol, 464 mg) in acetonitrile (10 mL), decylamine (1.2 mmol, 240  $\mu$ L) and DMT-MM (1.2 mmol, 332 mg) were added and the reaction was allowed to stir at room temperature for 24 h. After completion (monitored by TLC), 10 mL of water was added to reaction mixture. It was extracted with ethyl acetate (20 mL). The organic layer was washed with water, concentrated in vacuo to give the crude product of **S3** as a yellow gum in (633 mg) and used for the next reaction without further purification.

To a stirred solution of crude product of **S3** (633 mg) in THF (2.8 mL), triethylsilane (0.63 mL) and TFA (2.8 mL) were added and the reaction was allowed to stir at room temperature for 22 h. After concentration in vacuo, the resulting residue was purified using a Waters Prep System equipped with an XTerra Prep MS C18 OBD 5  $\mu$ m 30ID $\times$ 50 mm to afford the mixture of 2-TFA and **S2** as a yellow oil in (204 mg, 48% yield). Solvents A (TFA /water=1/1000, v/v) and solvent B (TFA/acetonitrile = 1/1000, v/v) were used as the mobile phases for the gradient elution (gradient curve: 25-65% B for 8 min, followed by 100% B for another 2 min (run-time, 10 min)). The flow rate was set at 40.0 mL/min. 2-TFA was dimerized to disulfide form **S4** during refrigerated storage.

**2-TFA**;  $\delta_{\text{H}}$  (500 MHz,  $\text{CD}_3\text{OD}$ ); 3.93 (1H, dd,  $J = 8.8, 10.4$  Hz), 3.35–3.20 (3H, m), 2.97 (2H, m,  $J = 8.0, 23.2, 72.8$  Hz), 1.54 (2H, t,  $J = 11.2$  Hz), 1.34–1.30 (16H, m), 0.90 (3H, t,  $J = 10.4$  Hz);  $\delta_{\text{C}}$  (126 MHz,  $\text{CD}_3\text{OD}$ ); 168.17, 33.09, 30.77, 30.74, 30.71, 30.47, 30.41, 30.33, 28.10, 28.02, 26.40, 23.76, 14.45; HRMS (ESI)  $[\text{M}+\text{H}]^+$  calcd. for  $\text{C}_{13}\text{H}_{29}\text{ON}_2\text{S}$  261.1995; found 261.1997.

**S4**;  $\delta_{\text{H}}$  (500 MHz,  $\text{CD}_3\text{OD}$ ); 4.11 (2H, dd,  $J = 8.8, 12.8$  Hz), 3.34–3.06 (8H, m), 1.54 (4H, dt,  $J = 10.4, 22.4$  Hz), 1.32–1.28 (32H, m), 0.88 (6H, t,  $J = 10.4$  Hz), 14.46, 0.00; HRMS (ESI)  $[\text{M}+\text{H}]^+$  calcd for  $\text{C}_{26}\text{H}_{55}\text{O}_2\text{N}_4\text{S}_2$  519.3761; found 519.3762.

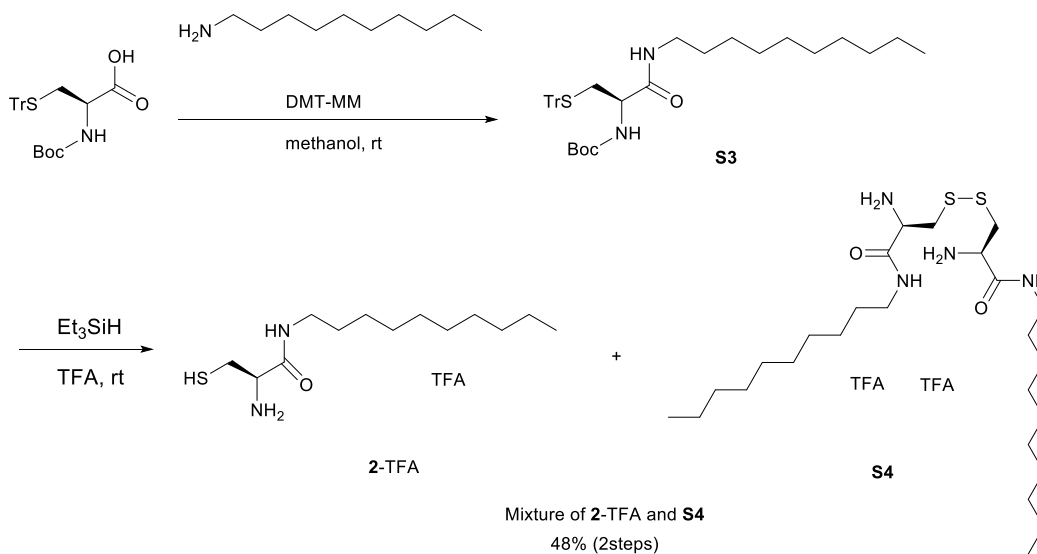

### Method for the synthesis of S7

To a stirred solution of 3-(tert-butoxycarbonyl)-2-phenylthiazolidine-4-carboxylic acid (0.1 mmol, 30 mg) in THF (1 mL), 1H,1H,2H,2H-perfluorodecylamine (0.2 mmol, 39  $\mu$ L) and DMT-MM (0.2 mmol, 54 mg) were added and the reaction was allowed to stir at room temperature for 18 h. After completion (monitored by TLC), 0.5 mL of water was added to the reaction mixture and all of the mixture was loaded to a fluorosilica gel spin column. After washing with 5 mL of 80% methanol/water, the crude product was eluted with methanol. The crude product of **S6** was purified by Preparative thin-Layer chromatography to afford 26.8 mg as a yellow oil in (26.8 mg, 37% yield).

To **S6** (0.0068 mmol, 5.1 mg), TFA (0.1 mL) were added, and the reaction was allowed to stir at room temperature for 2 h. The solution was concentrated in vacuo to give the product of **S7** as yellow oil in (3.6 mg, 71% yield).

$\delta_{\text{H}}$  (600 MHz,  $\text{CD}_3\text{OD}$ ); 8.25 (1H, s), 7.61 (2H, dd,  $J = 1.2, 4.8$  Hz), 7.46 (2H, m), 5.63 (1H, s), 4.92 (1H, d,  $J = 6.4$  Hz), 4.75 (1H, br), 3.67–3.49 (5H, m), 2.40–2.34 (2H, m); HRMS (ESI)  $[\text{M}+\text{H}]^+$  calcd. For  $\text{C}_{20}\text{H}_{16}\text{ON}_2\text{F}_{17}\text{S}$  655.0712; found 655.0710.

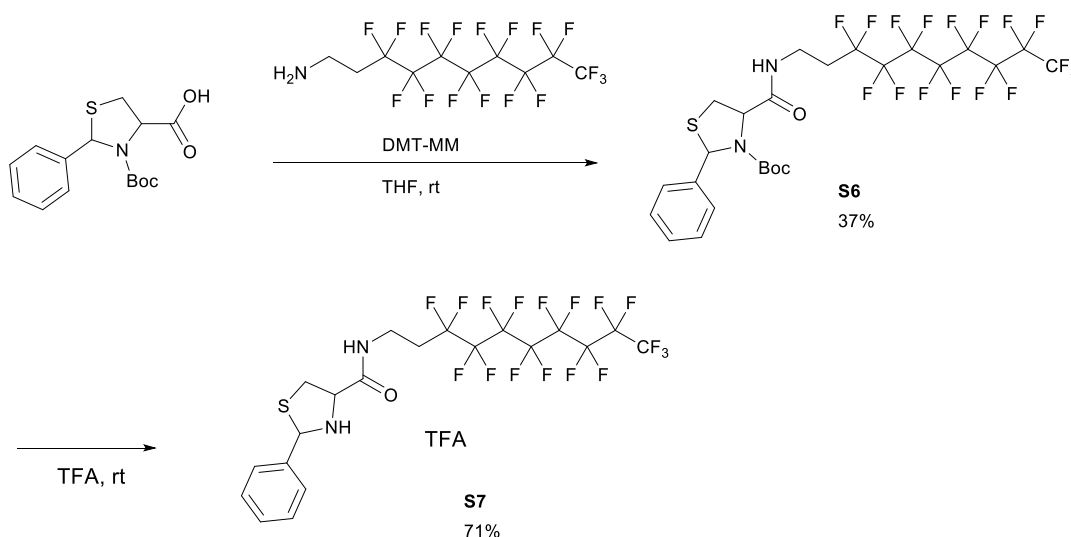

### Method for the synthesis of 10

To a stirred solution of Rf<sub>8</sub>CYS (0.0046 mmol, 3 mg) in methanol (1 mL), TCEP-HCl (0.021 mmol, 6 mg) were added, and the reaction was allowed to stir at room temperature for 1 h. To the reaction mixture, PBS (100 mmol/L, pH 7.4) and *p*-benzoquinone (0.044 mmol, 4.8 mg) were added, and the reaction was allowed to stir at room temperature for 3 h. The resulting residue was purified using a Shimadzu LC system equipped with an CAPCELL CORE C18, (2.7  $\mu$ m, 4.6 ID $\times$ 50 mm OSAKA SODA CO., LTD) to afford **10** as a yellow solid in (0.5 mg, 17% yield). Solvents A (water) and solvent B (acetonitrile) were used as the mobile phases for the gradient elution (gradient curve: 65% B for 1 min, 65-95% B for 2.5 min, 95% B for 1.1 min, 95-65% for 0.1 min followed by 65% B for another

1.3 min (run-time, 6 min)) The flow rate was set at 2.4 mL/min.

$\delta_{\text{H}}$  (600 MHz,  $\text{CDCl}_3$ ); 7.80 (1H, dd,  $J = 4.8, 4.8$  Hz), 7.28 (1H, d,  $J = 5.6$  Hz), 6.76 (1H, d,  $J = 2.0$  Hz), 6.69 (1H, dd,  $J = 2.0, 5.6$  Hz), 5.16 (1H, s), 3.75 (2H, t,  $J = 4.4$  Hz), 3.65 (2H, s), 2.47–2.41 (2H, m); HRMS (ESI)  $[\text{M}+\text{H}]^+$  calcd. for  $\text{C}_{19}\text{H}_{12}\text{O}_2\text{N}_2\text{F}_{17}\text{S}$  655.0348; found 655.0351.

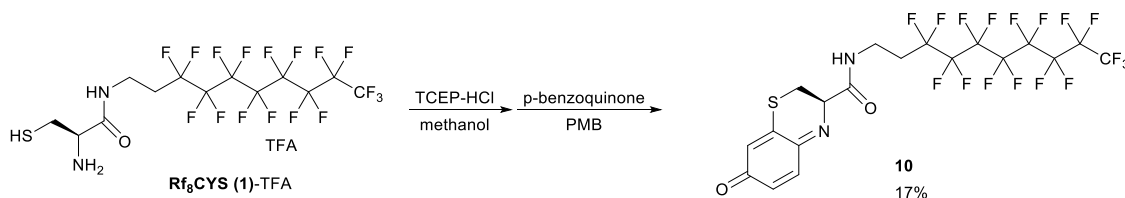

### Method for the synthesis of S8

To a stirred solution of **Rf<sub>8</sub>CYS** (0.013 mmol, 8.8 mg) in methanol (200  $\mu\text{L}$ ), TCEP-HCl (0.033 mmol, 9.5 mg) was added, and the reaction was allowed to stir at room temperature for 1 h. To the reaction mixture, triethylamine (0.246 mmol, 34  $\mu\text{L}$ ) and (2,3-epoxypropyl)benzene (0.123 mmol, 16.2  $\mu\text{L}$ ) were added, and the reaction was allowed to stir at room temperature for 3 h. To the reaction mixture, pyridine (0.246 mmol, 20  $\mu\text{L}$ ) and  $\text{Ac}_2\text{O}$  (0.246 mmol, 23  $\mu\text{L}$ ) were added, and the reaction was allowed to stir at room temperature for 24 h. The resulting residue was purified using a Shimadzu LC system equipped with an CAPCELL CORE C18, (2.7  $\mu\text{m}$ , 4.6 ID $\times$ 50 mm) to afford **10** as a white solid (5.7 mg, 55% yield). Solvents A (water) and solvent B (acetonitrile) were used as the mobile phases for the gradient elution (gradient curve: 65% B for 2 min, 65-95% B for 0.1 min, 95% B for 0.4 min, 95-65% for 0.5 min (run-time, 6 min)) The flow rate was set at 2.4 mL/min.

$\delta_{\text{H}}$  (600 MHz,  $\text{CDCl}_3$ ); 7.39–7.15 (5H, m), 6.78–6.67 (1H, m), 4.65–4.55 (1H, m), 4.41–3.95 (1H, m), 3.61–3.55 (2H, m), 3.15–2.58 (8H, m), 2.42–2.27 (2H, m), 2.02 (3H, s); HRMS (ESI)  $[\text{M}+\text{H}]^+$  calcd. for  $\text{C}_{24}\text{H}_{24}\text{O}_3\text{N}_2\text{F}_{17}\text{S}$  743.1231; found 743.1237.

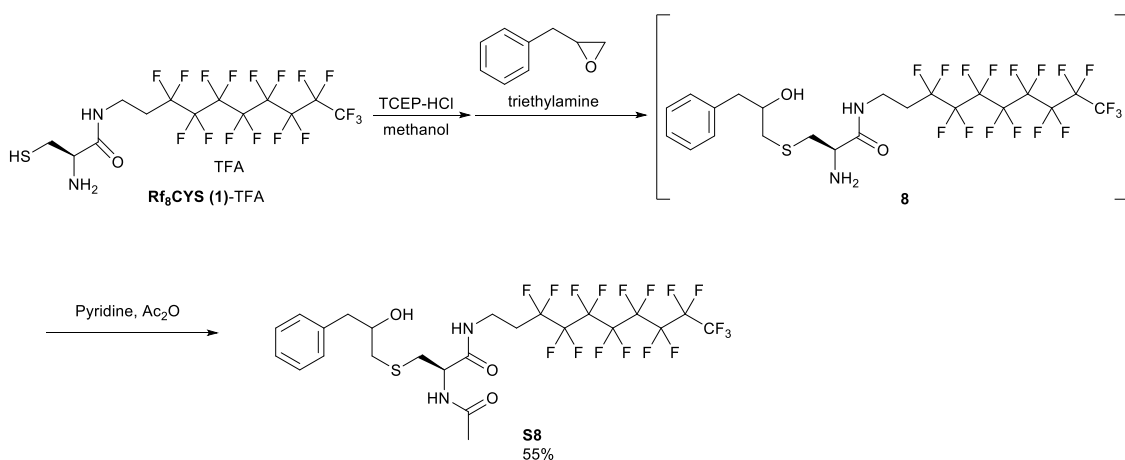

### 3 . Copies of $^1\text{H}$ , $^{13}\text{C}$ and $^{19}\text{F}$ NMR spectra

$^1\text{H}$  NMR of mixture ( $\text{Rf}_8\text{CYS-TFA}$  and **S2**)

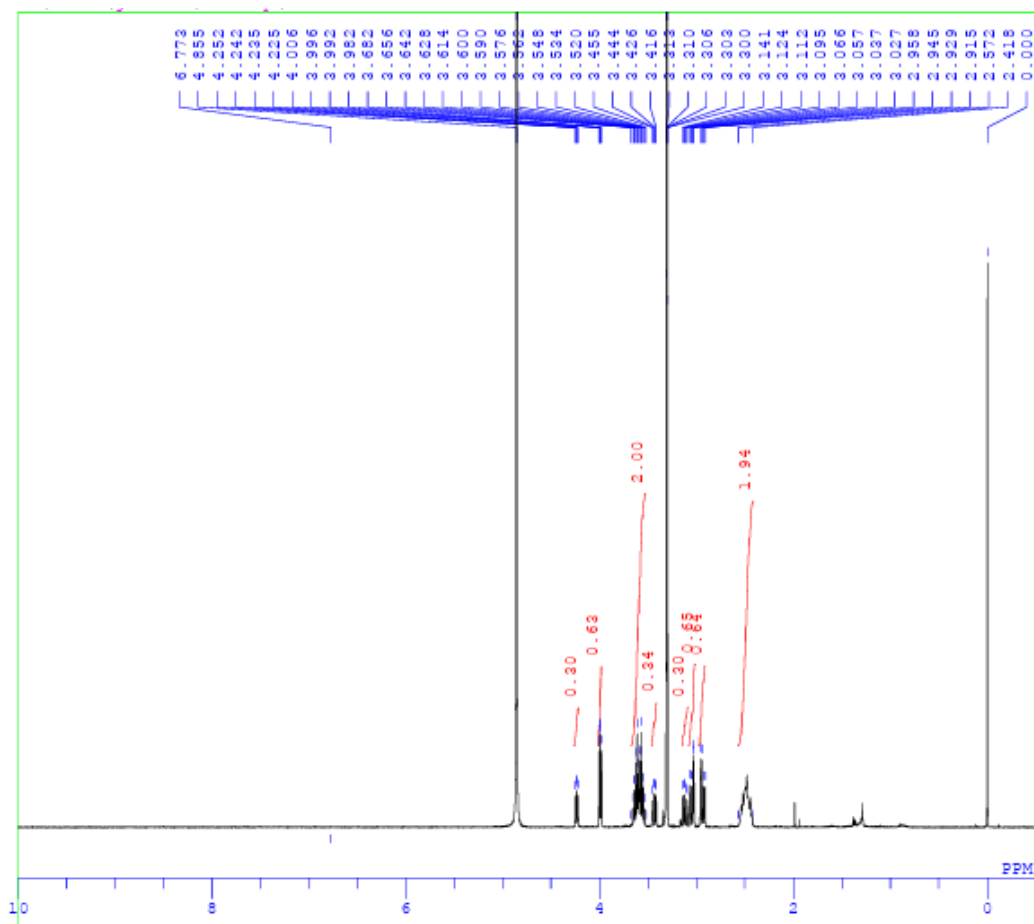

$^{13}\text{C}$  NMR of mixture (Rf<sub>8</sub>CYS-TFA and S2)

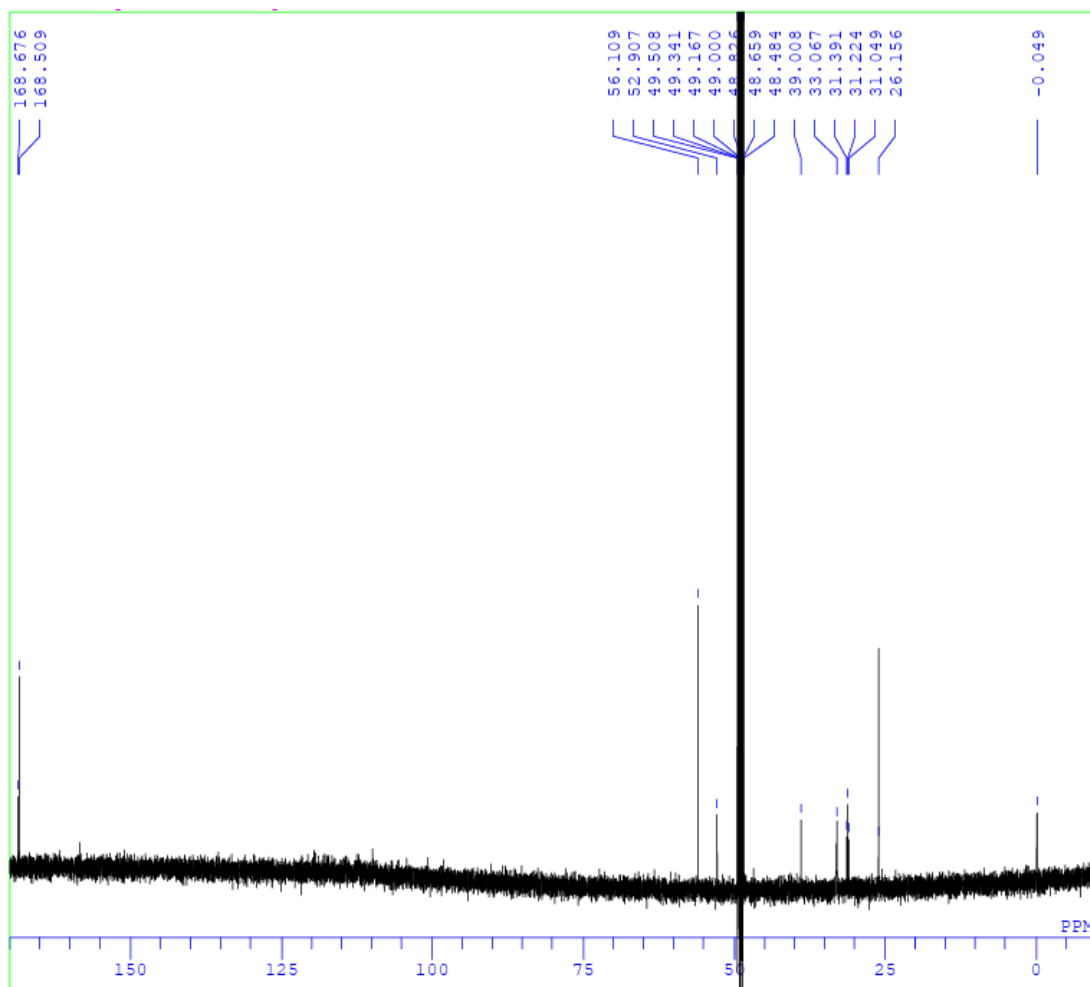

$^{19}\text{F}$  NMR of mixture ( $\text{Rf}_8\text{CYS-TFA}$  and **S2**)

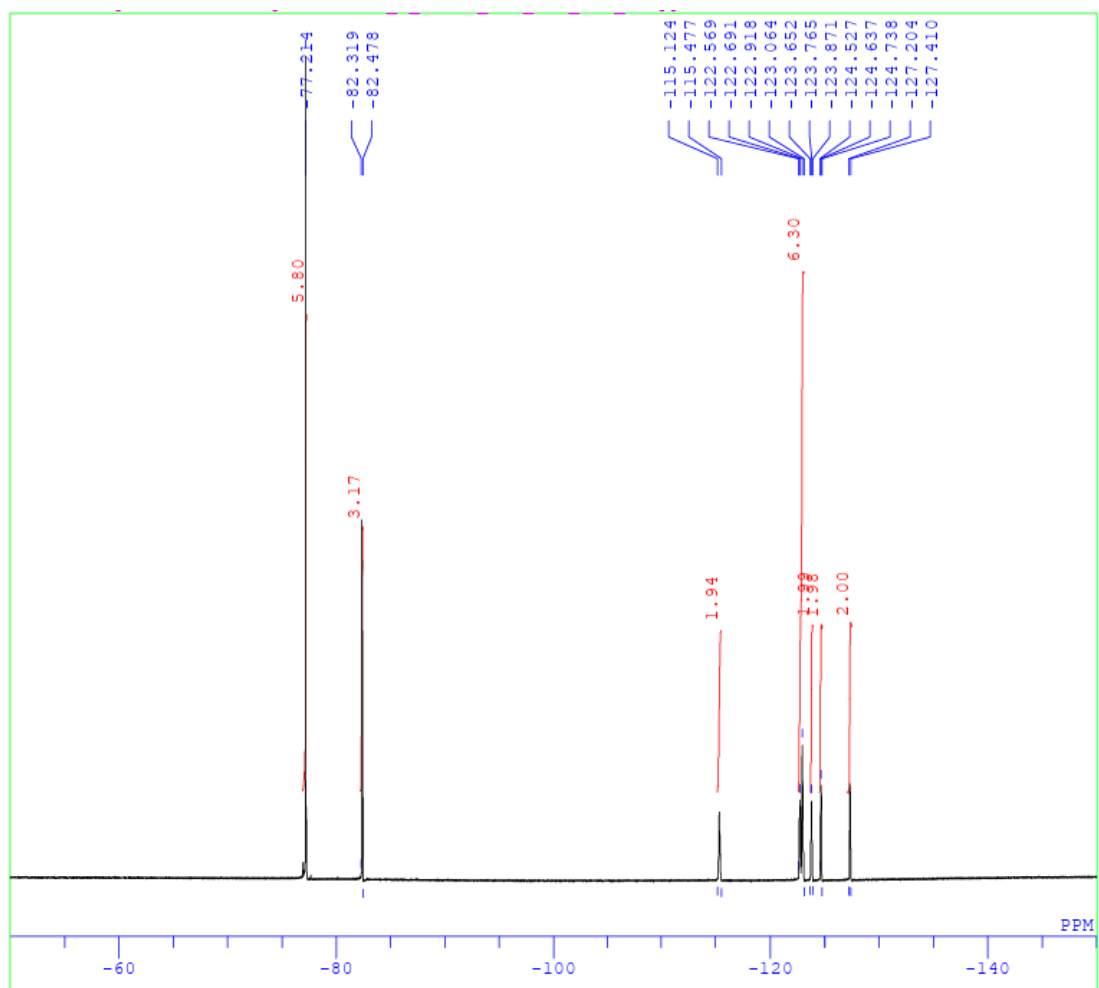

<sup>1</sup>H NMR of 2-TFA

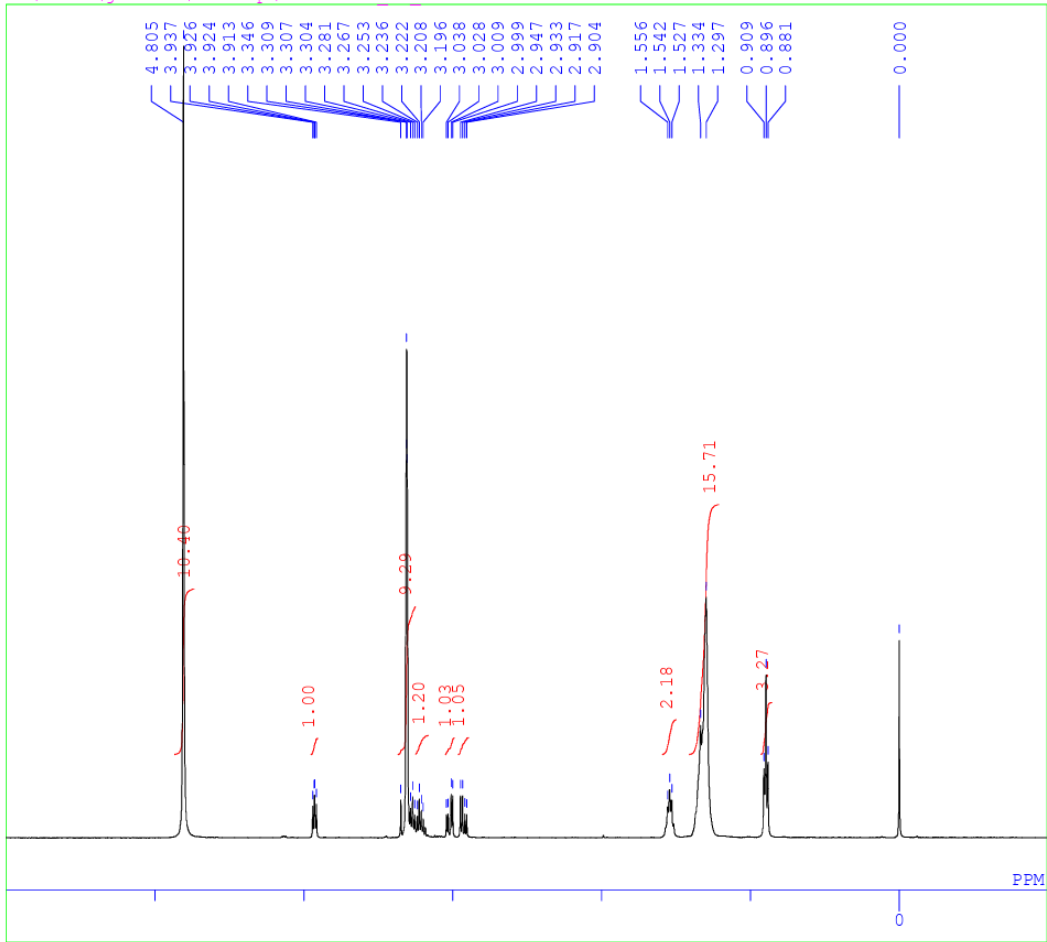



### <sup>13</sup>C NMR of 2-TFA

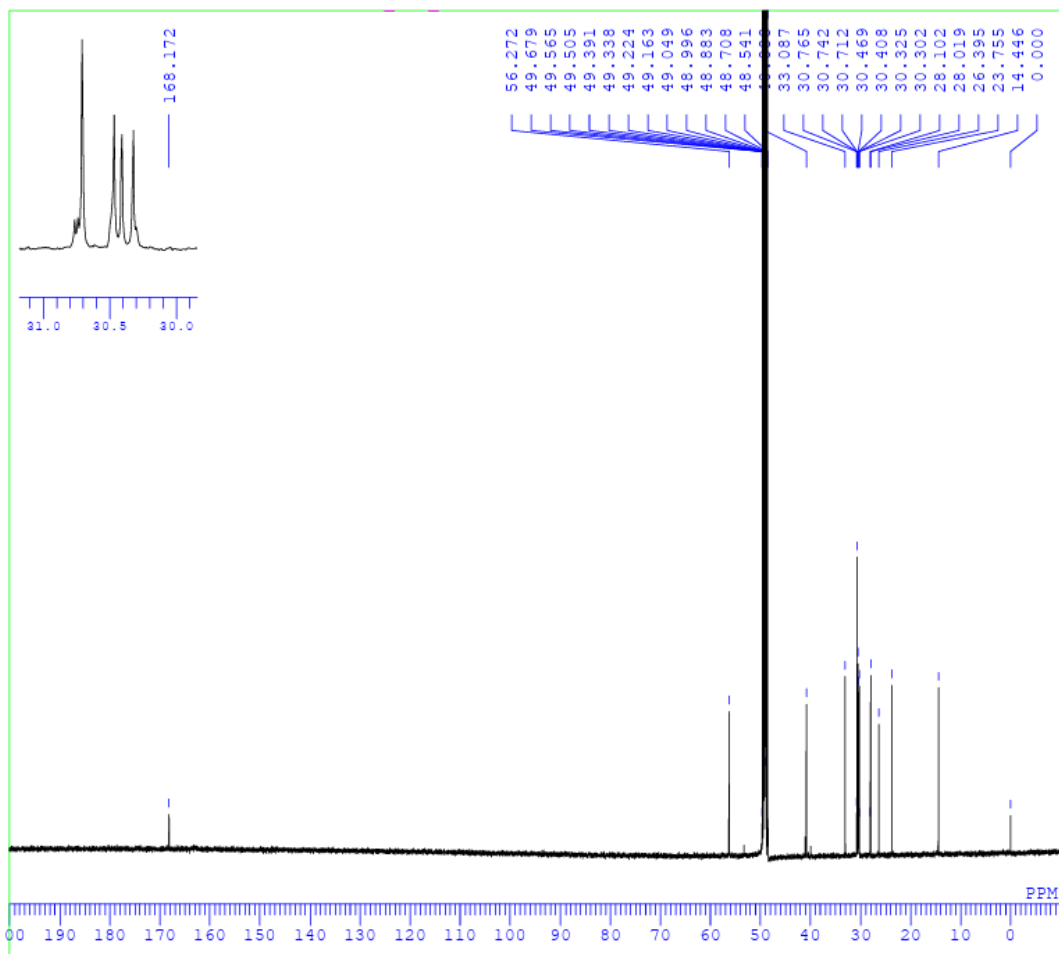

#### 4. Additional references

1. A. S. Kalgutkar and J. R. Soglia, *Expert Opin Drug Metab Toxicol*, 2005, **1**, 91-142.
2. Y. Li, M. Li, Z. Wang, M. Wen and J. Tang, *Rapid Commun. Mass Spectrom.*, 2020, **34**, e8947.
3. E. M. Lenz, S. Martin, R. Schmidt, P. E. Morin, R. Smith, D. J. Weston and M. Bayraktarian, *Chem. Res. Toxicol.*, 2014, **27**, 968-980.
